# Supplementary material for: A pilot study to investigate if New Zealand men with prostate cancer benefit from a Mediterranean-style diet
Source: PeerJ. 2015 Jul 2;3:e1080. doi: 10.7717/peerj.1080 (PMC4493678; doi:10.7717/peerj.1080)
Supplement: Supplemental Information 1 [file peerj-03-1080-s001.xlsx]

## Sheet: RESULTSx20
Participant Code	Age at baseline	Marital Status	Pca Rx	Tx	Other Ca Hx	Fam Hx	Year of Dx	Smoking Hx (Pack years)	Supps-0M	Supps-3M	Medication	Statin Med	Anti-inflammatory	Gleason	Height cm	Weight 0M	Weight 3M	Weight Change KG	BMI 0M	BMI 3M	BMI CHANGE	PSA 0M	PSA 3M	PSA CHANGE	CRP 0M	CRP 3M	CRP CHANGE	RPT CRP 00	RPT CRP 03	MedDiet 0M	MedDiet 3M	MedDiet 3M adj	MED DIET CHANGE	MEDajdChange					other changes
DIP006	74	M	WW	0	0	0	2011	0	BioACE (Blackmores). Omega3	BioACE (Blackmores)	Aspirin	0	1	3+4	1.721	75.4	73.68	-1.72	25.4571	24.8764	-0.58072	8.1	10	1.9	1	0	-1			8	16	16.5	8	8.5
DIP008	52	M	Prostatectomy 09/05/2011	1	1	2	2012	>12	0	0	0	0	0	3+3	1.84	102.88	99.2	-3.68	30.3875	29.3006	-1.08696	0.001	0.001	0	2	2	0			5	10	11	5	6
DIP009	61	M	Biopsy 09/02/2012 Leuprolide Acetate Cyproterone Acetate Radiotherapy 37 fractions	5	0	1,2	2009	1.25	0	0	Allopurinol	0	0	3+3	1.594	75.58	73.64	-1.94	29.7461	28.9826	-0.763528	0.05	0.001	-0.049	2	4	2			5	14	14.5	9	9.5
DIP010	55	M	Prostate adenocarcinoma, Gleason 6 (3+3), Radical prostatectomy 11/09/2009	1	0	2	2009	0	0	0	0	0	0	3+3	1.82	91.3	87.7	-3.6	27.5631	26.4763	-1.08683	0.001	0.001	0	0	0	0			2	11	14	9	12					Feels better, Bad food tastes unattractive. Happy with weight loss - has maintained…
DIP011	69	M	Prostate adenocarcinoma, PSA 6.6, Gleason 6 (3+3), Active surveillance, 12/10/2009 PSA 5.6, 09/2007; 4.8, 04/2008; 5.5, 11/2008; 6.1, 06/2009; 6.6, 09/2009	0	0	0	0	27	0	0	Aspirin, Celiprolol, Atorvastatin. Terazosin, Cilazapril	1	1	3+3	1.7	93	89.04	-3.96	32.1799	30.8097	-1.37024	7.7	7.3	-0.4	1	1	0			3	13	15.5	10	12.5					Jan 2014: Just before I started the diet I had a doctors report that my blood sugars were at a level where I should modify my diet to reduce blood sugar .HbA1c now 42. Nocturia reduced from 6x to 3x ,very occasionally 4 x
DIP013	64	M	WW	0	0	0	0	18	0	0	Diclofenac, Panadeine prn	0	2	3+3	1.775	77	70.96	-6.04	24.4396	22.5225	-1.91708	6.3	5.5	-0.8	0	0	0			4	9	10	5	6
DIP014	74	M	WW	0	0	0	0	4	multivit	multivit	Omeprazole Diclofenac Humira	0	2	3+3	1.71	86.6	89.4	2.8	29.616	30.5735	0.95756	5.5	6.6	1.1	2	2	0			2	13	13.5	11	11.5
DIP015	73	S	Prostate adenocarcinoma, pT3a, NX MX R1, Prostate biopsy Gleason Score 7(4+3) 01/05/2009. laparoscopic radical prostatectomy 09/10/2009, adjuvant radiotherapy (Within RAVE's trial) 09/02/2010 - 25/03/2010 PSA undetectable	4	0	0	2009	0	0	0	0	0	0	3+3	1.59	60	54.1	-5.9	23.7332	21.3995	-2.33377	0.001	0.001	0	0	0	0			12	16	16	4	4
DIP016	67	M	Prostate adenocarcinoma, pT3, initial PSA 13. Gleason 7 (3+4+5), 02/08/2010. Focal extraprostatic spread. Tumour present at posterior surgical margin. Post operation PSA 0.1	1	0	0	2010	1	0	0	3x BP meds - inihibace, metoprolol, Amlopidine	0	0	3+3	1.695	85	82	-3	29.5855	28.5413	-1.0442	0.001	0.001	0	2	1	-1			13	13	13	0	0
DIP017	63	M	Prostatectomy 24/06/2011	1	0	0	2009	26	0	0	Diclofenac	0	2	3+4	1.76	88.8	86.36	-2.44	28.6674	27.8796	-0.787707	0.001	0.001	0	1	6	5	1	7	5	13	15.5	8	10.5
DIP018	61	M	Prostate adenocarcinoma, PSA 5.8, Gleason 7(3+4), biopsy 20/07/2010 Brachtherapy 08/12/2010 PSA 3.0, 22/11/2007; 3.7, 08/10/2009; 4.9, 05/03/2010; 5.8, 19/06/2010; 4.7, 13/09/2010	6	0	1	2010	0	0	0	0	0	0	3+4	1.805	74.5	74.26	-0.24	22.8666	22.7929	-0.0736643	1.2	1	-0.2	0	0	0			7	14	15.5	7	8.5
DIP019	69	M	Prostatectomy 25/08/2003 Eligard injection 6/12 for 1 year, stopped 02/2012 Radiotherapy 36 fractions	3	0	0	2003	9	Multivit B Comp	Multivit B Comp	1x BP med Plendil	0	0	3+4	1.75	87.5	85.5	-2	28.5714	27.9184	-0.653061	0.25	0.001	-0.249	4	1	-3	4	1	5	15	15.5	10	10.5
DIP021	65	M	Prostatectomy 20/04/2012	1	0	0	2012	29	0	0	statin at end	0	0	3+4	1.83	107.38	111.2	3.82	32.0643	33.2049	1.14067	0.001	0.001	0	0	0	0			8	11	13	3	5
DIP022	66	M	Prostate adenocarcinoma, PSA 4.8, T1c, Gleason 6 (3+3), 11/10/2010 T2c, Gleason 7 (3+4), redical prostatectomy, 30/12/2010 PSA 4.6, 10/2008; 4.7, 11/2009; 4.3, 02/2010; 4.8, 09/2010; <0.05 , 03/2011	1	1	0	2010	0	0	0	Ropinirole, Omeprazole, Efexor, Sinemet, Aspirin, Simvastatin	1	1	3+3	1.805	89.6	84.66	-4.94	27.5013	25.9851	-1.51626	0.001	0.001	0	1	2	1			5	10	13.5	5	8.5
DIP023	66	M	Biopsy 07/12/2011 Prostatectomy 08/05/2012	1	1	0	2012	32	0	0	Aspirin, Simvastatin	1	1	7 (4+3) po 7 (3+4)	1.703	84.54	81.2	-3.34	29.1496	27.998	-1.15164	0.001	0.001	0	1	0	-1		(was 8)	10	17	17	7	7
DIP024	73	M	WW	0	1	0	0	3.25	0	0	Simvastatin, Felodipine, Indaramide	1	0	3+3	1.75	99.9	98.8	-1.1	32.6204	32.2612	-0.359184	4.4	4.1	-0.3	8	3	-5	8	3	7	10	11	3	4
DIP025	67	M	Prostatectomy 31/03/2009	1	0	0	2009	<1	Omega 3, Spirulina, MSM	Omega 3, Spirulina, MSM	Losec, glucosamie	0	0	3+4	1.695	75.3	73.8	-1.5	26.2093	25.6872	-0.522098	0.001	0.001	0	3	5	2			8	12	12.5	4	4.5					Feb 2014: improved my general health and reduced my cholesterol
DIP026	70	S	Prostatectomy 04/07/2005	1	0	0	2005	22	Omega 3	Omega 3	Aspirin, Simvastatin	1	1	3+3	1.725	88.6	86	-2.6	29.7753	28.9015	-0.873766	0.001	0.001	0	0	1	1			3	12	12.5	9	9.5
DIP027	57	S	WW	0	0	1,2	0	0	Vit C	Vit C, Omega 3-6-9,		0	0	3+3	1.66	70	70.26	0.26	25.4028	25.4972	0.0943533	3.7	3.1	-0.6	3	2	-1			5	7	9	2	4
DIP028	63	M	Prostate adenocarcinoma, Gleason Score 7 (3+4). Laparoscopic robotic assisted radical prostatectomy 05/11/2009	1	0	0	0	0	0	0	Zarator, Citalopram, Aspirin	1	1	3+3	1.805	78.7	74.88	-3.82	24.1557	22.9832	-1.17249	0.001	0.001	0	0	0	0			9	13	13.5	4	4.5
MEANS					0=nil, 1=skin	0-nil, 1=immed, 2=other fam							1= aspirin 2=diclofenac 3=other		1.7198	84.696	82.148	-2.548	28.7089	27.8729	-0.836023	3.9102	3.8804	-0.0298	5	7	#REF!			3.2	12	13.5
t-tests																										had local infection in arm wound
																									Ttest	0.910531
																		-2.33
																		-1.28				test	0.353948
			Codes for treatment
			0 - Active Surveillance or WW
			1 - Prostatectomy
			2 - Hormones
			3 - Prostatectomy + Radiotherapy + Hormones
			4 - Prostatectomy + Radiotherapy
			5 - Hormones + Radiotherapy
			6 - Brachytherapy only

## Sheet: Comet_Mn
	MEANS EXP							Medians RAW
	FB BT mean			H2O2 BT Mean				FB RAW Median			H2O2 RAW Mean
	00M	03M		00M	03M			00M	03M	change	00M	03M
006	0.617757	0.327486		1.37859	1.07799			3.185	2.145	-1.04	6.315	7.335	1.02
008	1.32108	1.0605		2.35479	1.26606			3.28	0	-3.28	5.15	4.12	-1.03
009	1.06784	0.869192		1.27371	1.06969			2.93	2.755	-0.175	6.43	5.5	-0.93
010	1.22518	1.00974		0.945993	0.454144			4.03	3.995	-0.035	5.31	2.33	-2.98
011	0.380482	0.631711		0.727748	0.893638			5.345	4.785	-0.56	3.445	4.52	1.075
013	0.607229	0.922314		0.573325	0.478112			1.62	3.67	2.05	3.285	4.685	1.4
014	0.452124	0.201525		0.709001	0.387584			3.465	0.98	-2.485	2.265	2.71	0.445
015	0.562009	0.145048		0.978796	0.361869			5	1.275	-3.725	2.255	1.81	-0.445
016	0.880882	0.788372		2.02054	1.11813			2.39	2.775	0.385	5.265	2.425	-2.84
017	0.37366	0.193397		1.41613	0.590686			2.1	1.205	-0.895	3.025	2.41	-0.615
018	0.725046	0.336804		1.43463	1.12024			3.09	1.225	-1.865	4.5	3.49	-1.01
019	0.35809	0.381859		1.26435	0.704216			2.015	1.035	-0.98	6.555	3.58	-2.975
021	0.653785	0.837918		0.505297	0.400835			1.165	3.045	1.88	2.215	1.675	-0.54
022	0.633938	0.633938		1.20385	1.41025			2.72	2.16	-0.56	2.745	4.155	1.41
023	1.42296	0.361849		0.691237	0.815127			3.28	1.105	-2.175	1.3	2.125	0.825
024	1.26037	0.292333		1.05773	0.922437			2	3.4	1.4	2.195	2.63	0.435
025	0.724966	0.544177		0.343057	1.02618			2.82	2.145	-0.675	1.09	2.955	1.865
026	1.14062	0.493063		0.737523	0.524169			5.415	3.385	-2.03	4.53	1.995	-2.535
027	1.66683	1.84061		1.91179	1.19654			2.76	3.595	0.835	4.88	5.635	0.755
028	0.553188	1.36036		0.656659	0.784113			4.225	2.36	-1.865	5.45	4.57	-0.88
AVERAGE	0.831402	0.66161		1.10924	0.8301		AVERAGE	3.14175	2.352	-0.78975	3.91025	3.53275	-0.3775
t-test	t-test	0.0922001		0.00948159				t-test	0.039787		t-test	0.287501

## Sheet: COMET_ALL
Fb_0M		Fb-3M			H202_0M		H202_3M
Tail DNA		Tail DNA			Tail DNA		Tail DNA
2.15	0.765468	4.96	1.60141		1.73	0.548121	39.61	3.67908
3.83	1.34286	0.02	-3.91202		1e-06	-13.8155	20.86	3.03783
14.12	2.64759	1e-06	-13.8155		13.04	2.56802	0.55	-0.597837
0.33	-1.10866	0.09	-2.40795		10.03	2.30558	4.27	1.45161
1e-06	-13.8155	1e-06	-13.8155		1e-06	-13.8155	27.71	3.32179
16.43	2.79911	0.03	-3.50656		0.01	-4.60517	19.96	2.99373
5.98	1.78842	11.15	2.41144		16.37	2.79545	7.97	2.07568
4.12	1.41585	2.52	0.924259		23.77	3.16842	15.33	2.72981
2.99	1.09527	4.32	1.46326		4.92	1.59331	17.09	2.83849
1.48	0.392042	0.35	-1.04982		3.71	1.31103	0.08	-2.52573
0.13	-2.04022	1.52	0.41871		19.15	2.9523	6.12	1.81156
12.39	2.51689	8.65	2.15756		11.25	2.42037	0.38	-0.967584
8.73	2.16677	1.58	0.457425		23.57	3.15997	1.01	0.00995033
1e-06	-13.8155	1e-06	-13.8155		7.18	1.9713	11.98	2.48324
3.15	1.1474	1e-06	-13.8155		5.2	1.64866	15.3	2.72785
2.2	0.788457	0.88	-0.127833		9.39	2.23965	24.02	3.17889
0.38	-0.967584	1.37	0.314811		2.42	0.883768	1e-06	-13.8155
0.47	-0.755023	0.02	-3.91202		9.85	2.28747	25.33	3.23199
0.44	-0.820981	23.53	3.15828		6.44	1.86253	17.96	2.88815
0.3	-1.20397	1.78	0.576613		8.92	2.1883	0.02	-3.91202
0.71	-0.34249	1.95	0.667829		8.67	2.15987	22.07	3.09422
1e-06	-13.8155	2.34	0.850151		0.37	-0.994252	9.85	2.28747
2.02	0.703098	25.93	3.2554		7.39	2.00013	13.29	2.58701
1.58	0.457425	39.96	3.68788		13.19	2.57946	6.96	1.94018
0.01	-4.60517	28.49	3.34955		10.58	2.35897	0.06	-2.81341
3.22	1.16938	42.27	3.74408		0.2	-1.60944	15.13	2.71668
15.64	2.74983	0.01	-4.60517		22.34	3.10638	1e-06	-13.8155
1e-06	-13.8155	12.25	2.50553		4.81	1.5707	15.86	2.7638
1.92	0.652325	0.02	-3.91202		1.2	0.182322	26.21	3.26614
0.01	-4.60517	5.03	1.61542		6.27	1.83578	0.11	-2.20727
8.7	2.16332	28.55	3.35166		0.93	-0.0725707	6.2	1.82455
10.02	2.30458	21.02	3.04547		6.36	1.85003	1.84	0.609766
10.33	2.33505	0.32	-1.13943		8.24	2.109	2.98	1.09192
5.33	1.67335	4.39	1.47933		18.56	2.92101	7.64	2.0334
8.09	2.09063	11.51	2.44322		0.07	-2.65926	0.42	-0.867501
10.52	2.35328	11.18	2.41413		7.79	2.05284	1.32	0.277632
9.4	2.24071	1e-06	-13.8155		14.54	2.6769	1e-06	-13.8155
5.11	1.6312	1.83	0.604316		30.33	3.41214	4.43	1.4884
9.08	2.20607	2.82	1.03674		4.66	1.53902	5.53	1.71019
3.87	1.35325	7.09	1.95869		1.45	0.371564	1e-06	-13.8155
4.02	1.39128	0.59	-0.527633		0.69	-0.371064	19.51	2.97093
10.79	2.37862	27.67	3.32035		1e-06	-13.8155	7.88	2.06433
0.01	-4.60517	26.52	3.2779		1	0	33.28	3.50496
1.77	0.57098	1e-06	-13.8155		0.11	-2.20727	3.66	1.29746
3.8	1.335	12.96	2.56187		0.28	-1.27297	0.87	-0.139262
11.35	2.42922	3.07	1.12168		0.85	-0.162519	27.69	3.32107
0.32	-1.13943	0.01	-4.60517		11.29	2.42392	1e-06	-13.8155
7.43	2.00553	22.82	3.12764		0.82	-0.198451	7.03	1.95019
9.25	2.22462	0.01	-4.60517		20.21	3.00618	31.04	3.43528
0.02	-3.91202	0.22	-1.51413		0.09	-2.40795	8.74	2.16791
0.72	-0.328504	0.38	-0.967584		1.36	0.307485	0.32	-1.13943
0.51	-0.673345	12.1	2.49321		18.16	2.89922	12.85	2.55334
1e-05	-11.5129	1.56	0.444686		8.06	2.08691	6.61	1.88858
12.43	2.52011	0.11	-2.20727		12.07	2.49072	2.42	0.883768
1.16	0.14842	3.59	1.27815		0.28	-1.27297	1.25	0.223144
7.34	1.99334	11.61	2.45187		1.18	0.165514	7.85	2.06051
0.28	-1.27297	7.63	2.03209		0.06	-2.81341	8.58	2.14943
12.75	2.54553	6.19	1.82294		0.42	-0.867501	0.31	-1.17118
19.04	2.94654	0.35	-1.04982		5.27	1.66203	0.48	-0.733969
0.17	-1.77196	1e-06	-13.8155		0.42	-0.867501	9.49	2.25024
0.2	-1.60944	10.98	2.39608		14.93	2.70337	1e-05	-11.5129
7.75	2.04769	7.05	1.95303		1e-06	-13.8155	24.19	3.18594
0.05	-2.99573	16.97	2.83145		9.57	2.25863	20.94	3.04166
0.73	-0.314711	11.17	2.41323		9.7	2.27213	1.12	0.113329
3.29	1.19089	11.07	2.40424		1.72	0.542324	0.04	-3.21888
2.92	1.07158	0.28	-1.27297		0.51	-0.673345	30.67	3.42328
5.46	1.69745	13.63	2.61227		28.96	3.36592	4.78	1.56444
1.02	0.0198026	1.74	0.553885		0.06	-2.81341	30.64	3.42231
5.66	1.73342	0.09	-2.40795		21.8	3.08191	6.49	1.87026
1.56	0.444686	4.62	1.53039		9.78	2.28034	3.46	1.24127
15.54	2.74342	0.32	-1.13943		22.03	3.09241	25.62	3.24337
0.03	-3.50656	0.47	-0.755023		5.28	1.66393	7.32	1.99061
6.54	1.87794	0.22	-1.51413		4.09	1.40854	0.04	-3.21888
13.74	2.62031	0.16	-1.83258		4.25	1.44692	0.66	-0.415515
5.52	1.70838	10.58	2.35897		1.13	0.122218	19.59	2.97502
5.5	1.70475	1.4	0.336472		0.62	-0.478036	0.97	-0.0304592
6.02	1.79509	2.64	0.970779		21.5	3.06805	7.08	1.95727
0.71	-0.34249	1e-06	-13.8155		6.59	1.88555	26.62	3.28166
2.39	0.871293	24.55	3.20071		2.72	1.00063	0.79	-0.235722
12.34	2.51285	21.24	3.05589		5.03	1.61542	1e-05	-11.5129
4.27	1.45161	36.41	3.59484		3.25	1.17865	0.38	-0.967584
2.63	0.966984	1.97	0.678034		8.81	2.17589	10.99	2.39699
1.23	0.207014	0.78	-0.248461		0.02	-3.91202	1.2	0.182322
0.19	-1.66073	9.73	2.27521		13.39	2.59451	0.41	-0.891598
4.6	1.52606	26.73	3.28579		15.34	2.73046	21.35	3.06105
2.71	0.996949	1e-06	-13.8155		16.85	2.82435	0.84	-0.174353
0.43	-0.84397	1.15	0.139762		4.49	1.50185	0.35	-1.04982
4.3	1.45862	1	0		5.93	1.78002	1.3	0.262364
4.93	1.59534	4.15	1.42311		1.45	0.371564	1e-05	-11.5129
12.93	2.55955	12.54	2.52892		9.25	2.22462	0.26	-1.34707
0.42	-0.867501	1.16	0.14842		21.86	3.08466	0.01	-4.60517
3.27	1.18479	5.34	1.67523		10.35	2.33699	7.53	2.0189
14.48	2.67277	20.43	3.017		12.89	2.55645	19.64	2.97757
16.39	2.79667	1.23	0.207014		0.92	-0.0833816	0.23	-1.46968
1e-05	-11.5129	32.56	3.48308		0.4	-0.916291	12.04	2.48823
6.77	1.9125	0.19	-1.66073		0.15	-1.89712	20.7	3.03013
0.01	-4.60517	1.57	0.451076		7.05	1.95303	25.54	3.24025
8.24	2.109	0.06	-2.81341		42.74	3.75514	0.65	-0.430783
11.3	2.4248	4.85	1.57898		4.68	1.5433	6.12	1.81156
0.73	-0.314711	1.87	0.625938		0.45	-0.798508	14.09	2.64547
0.37	-0.994252	10.79	2.37862		0.05	-2.99573	8.08	2.08939
0.01	-4.60517	14.13	2.6483		43.11	3.76375	4.59	1.52388
2.97	1.08856	13.06	2.56955		40.7	3.70623	3.99	1.38379
2.49	0.912283	0.45	-0.798508		1.19	0.173953	0.16	-1.83258
0.64	-0.446287	1.04	0.0392207		4.53	1.51072	0.52	-0.653926
8.43	2.1318	1.33	0.285179		1e-06	-13.8155	6.41	1.85786
2.89	1.06126	9.68	2.27006		1e-06	-13.8155	1e-06	-13.8155
5.33	1.67335	29.96	3.39986		0.08	-2.52573	0.06	-2.81341
11.57	2.44842	0.05	-2.99573		23.02	3.13636	11.63	2.45359
0.25	-1.38629	2.85	1.04732		9.8	2.28238	3.75	1.32176
8.62	2.15409	1e-06	-13.8155		1.42	0.350657	8.06	2.08691
0.2	-1.60944	14.71	2.68853		5.02	1.61343	1.79	0.582216
3.62	1.28647	3.87	1.35325		1.41	0.34359	13.32	2.58927
25.36	3.23317	9.5	2.25129		20.35	3.01308	19.97	2.99423
35.37	3.56586	15.07	2.71271		0.44	-0.820981	0.55	-0.597837
0.01	-4.60517	0.39	-0.941609		2.78	1.02245	0.69	-0.371064
2.65	0.97456	2.32	0.841567		4.69	1.54543	9.97	2.29958
5.08	1.62531	3.74	1.31909		7.84	2.05924	14.06	2.64333
1.2	0.182322	0.01	-4.60517		16.84	2.82376	1e-06	-13.8155
1.26	0.231112	5.9	1.77495		2.06	0.722706	1e-06	-13.8155
14.37	2.66514	1.26	0.231112		9.72	2.27419	1.75	0.559616
16.6	2.8094	6.63	1.8916		0.05	-2.99573	23.08	3.13897
1e-06	-13.8155	0.33	-1.10866		4.42	1.48614	33.38	3.50796
0.54	-0.616186	4.67	1.54116		0.86	-0.150823	0.02	-3.91202
7.28	1.98513	0.14	-1.96611		14.92	2.7027	1.19	0.173953
0.16	-1.83258	3.89	1.35841		12.31	2.51041	7.62	2.03078
0.49	-0.71335	1.84	0.609766		0.05	-2.99573	13.69	2.61667
8.21	2.10535	13.55	2.60639		0.11	-2.20727	2.69	0.989541
1.55	0.438255	2.66	0.978326		22.71	3.12281	0.56	-0.579818
1e-06	-13.8155	1e-06	-13.8155		9.42	2.24284	0.19	-1.66073
0.07	-2.65926	0.41	-0.891598		0.44	-0.820981	0.01	-4.60517
4.15	1.42311	15.43	2.73631		16.98	2.83204	10	2.30259
6.21	1.82616	0.52	-0.653926		9.02	2.19944	0.1	-2.30259
23.72	3.16632	1	0		29.61	3.38811	15.25	2.72458
10.67	2.36744	6.35	1.84845		13.96	2.6362	0.01	-4.60517
0.07	-2.65926	1.85	0.615186		16.1	2.77882	13.97	2.63691
0.02	-3.91202	2.02	0.703098		0.02	-3.91202	1.14	0.131028
27.95	3.33042	0.01	-4.60517		0.02	-3.91202	9.91	2.29354
10.3	2.33214	0.09	-2.40795		0.32	-1.13943	0.41	-0.891598
8.63	2.15524	1e-06	-13.8155		1e-06	-13.8155	0.42	-0.867501
6.54	1.87794	13.89	2.63117		17.07	2.83732	13.57	2.60786
0.57	-0.562119	6.8	1.91692		11.44	2.43712	13.56	2.60712
0.16	-1.83258	1.95	0.667829		17.12	2.84025	7.57	2.02419
0.25	-1.38629	0.16	-1.83258		31.97	3.4648	16.63	2.81121
14	2.63906	5.93	1.78002		1.5	0.405465	15.86	2.7638
13.49	2.60195	3.51	1.25562		22.68	3.12148	12.9	2.55723
0.43	-0.84397	0.69	-0.371064		0.17	-1.77196	18.62	2.92424
17.65	2.87074	3.91	1.36354		27.45	3.31237	14.62	2.68239
16.45	2.80033	19.75	2.98315		16.23	2.78686	1.39	0.329304
0.68	-0.385662	10.15	2.31747		10.43	2.34469	9.67	2.26903
1e-06	1.06784	0.15	-1.89712		1.81	0.593327	13.49	2.60195
0.32	0	7.43	2.00553		17.39	2.8559	2.09	0.737164
0.32	0	1e-06	-13.8155		21.15	3.05164	0.02	-3.91202
3.47	0	0.05	-2.99573		1e-06	-13.8155	8.21	2.10535
8.77	0	0.12	-2.12026		10.83	2.38232	14.77	2.6926
0.04	0	13.51	2.60343		4.14	1.4207	0.33	-1.10866
8.87	0	11.49	2.44148		1.3	0.262364	0.15	-1.89712
3.62	0	21.33	3.06011		0.3	-1.20397	3.5	1.25276
21.22	0	0.3	-1.20397		9.45	2.24601	1.2	0.182322
1.04	0	7.23	1.97824		3.41	1.22671	1e-06	-13.8155
5.39	0	15.45	2.73761		5.66	1.73342	0.23	-1.46968
0.12	0	0.15	-1.89712		31.16	3.43914	10.41	2.34277
0.25	0	2.07	0.727549		1e-06	-13.8155	1e-06	-13.8155
0.17	0	0.29	-1.23787		5.11	1.6312	0.35	-1.04982
6.19	0	0.15	-1.89712		26.36	3.27185	0.12	-2.12026
4.44	0	3.4	1.22378		1.56	0.444686	0.02	-3.91202
6.19	0	14.47	2.67208		7.95	2.07317	15.2	2.7213
17.25	0	10.83	2.38232		27.19	3.30285	4.1	1.41099
0.06	0	1e-06	-13.8155		0.15	-1.89712	10.36	2.33795
5.13	0	15.4	2.73437		14.21	2.65395	19.88	2.98971
1e-06	0	1.26	0.231112		0.25	-1.38629	21.51	3.06852
2.45	0	13.18	2.5787		1e-06	-13.8155	0.08	-2.52573
0.29	0	11.61	2.45187		14.32	2.66166	1.07	0.0676586
5.36	0	3.4	1.22378		11.42	2.43537	12.4	2.5177
0.54	0	3.37	1.21491		14.64	2.68376	15.1	2.71469
0.17	0	0.19	-1.66073		0.08	-2.52573	0.09	-2.40795
10.2	0	4.59	1.52388		0.23	-1.46968	0.22	-1.51413
14.07	0	11.06	2.40333		9.52	2.25339	1e-06	-13.8155
2.44	0	0.26	-1.34707		0.69	-0.371064	2.09	0.737164
0.12	0	11.03	2.40062		6.9	1.93152	2.57	0.943906
15.66	0	9.78	2.28034		0.05	-2.99573	27.07	3.29843
19.18	0	4.83	1.57485		11.29	2.42392	0.48	-0.733969
24.76	0	0.33	-1.10866		0.94	-0.0618754	4.15	1.42311
0.35	0	0.29	-1.23787		12.9	2.55723	16.38	2.79606
0.1	0	5.6	1.72277		1e-06	-13.8155	14.2	2.65324
0.51	0	12.39	2.51689		5.51	1.70656	3.41	1.22671
4.51	0	5.72	1.74397		0.01	-4.60517	11.82	2.46979
7.25	0	12.49	2.52493		2.96	1.08519	1e-06	-13.8155
5.5	0	8.68	2.16102		20.6	3.02529	1e-06	-13.8155
3.04	0	1.14	0.131028		1.68	0.518794	5.27	1.66203
31.35	0	0.76	-0.274437		26.98	3.2951	11.29	2.42392
13.63	0	6.98	1.94305		8.5	2.14007	0.03	-3.50656
10.13	2.3155	1.97	0.678034		0.14	-1.96611	0.19	-1.66073
16.56	2.80699	0.95	-0.0512933		20.53	3.02189	0.47	-0.755023
0.65	-0.430783	26.59	3.28054		2.44	0.891998	0.74	-0.301105
14.23	2.65535	1e-06	-13.8155		10.45	2.3466	24.63	3.20397
0.11	-2.20727	10.33	2.33505		0.88	-0.127833	0.6	-0.510826
1.83	0.604316	5.09	1.62728		0.12	-2.12026	8.74	2.16791
4.57	1.51951	0.5	-0.693147		21.67	3.07593	5.88	1.77156
18.02	2.89148	0.21	-1.56065		13.11	2.57338	11.88	2.47486
5.82	1.7613	20.3	3.01062		4.92	1.59331	0.02	-3.91202
1e-06	1.7613	13.29	2.58701		5.19	1.64673	1.47	0.385262
8.08	2.08939	7.2	1.97408		2.16	0.770108	30.37	3.41346
32.39	3.47785	15.09	2.71403		3.31	1.19695	24.81	3.21125
1.95	0.667829	1e-06	-13.8155		12.05	2.48906	19.37	2.96373
27.7	3.32143	0.15	-1.89712		0.51	-0.673345	8.54	2.14476
9.29	2.22894	2.85	1.04732		32.36	3.47692	33.49	3.51125
1e-06	-13.8155	1e-06	-13.8155		2.41	0.879627	0.68	-0.385662
15.37	2.73242	0.04	-3.21888		0.79	-0.235722	30.44	3.41576
2.3	0.832909	12.61	2.53449		4.1	1.41099	1e-06	-13.8155
0.02	-3.91202	9.92	2.29455		0.05	-2.99573	3.28	1.18784
0.59	-0.527633	10.16	2.31846		6.82	1.91986	5.73	1.74572
7.37	1.99742	25.8	3.25037		0.67	-0.400478	1.85	0.615186
30.22	3.4085	1e-06	-13.8155		0.17	-1.77196	6.92	1.93442
0.71	-0.34249	15.76	2.75748		1.13	0.122218	24.92	3.21567
24.31	3.19089	1.51	0.41211		0.39	-0.941609	6.2	1.82455
11.44	2.43712	27.15	3.30138		1.21	0.19062	2.22	0.797507
11.13	2.40964	7.26	1.98238		15.54	2.74342	0.05	-2.99573
1e-06	-13.8155	5.08	1.62531		8.49	2.13889	0.15	-1.89712
17.41	2.85704	24.35	3.19253		10.65	2.36556	13.53	2.60491
3.24	1.17557	28.24	3.34074		20.88	3.03879	0.25	-1.38629
0.11	-2.20727	3.35	1.20896		1e-06	-13.8155	15.13	2.71668
1e-06	-13.8155	5.09	1.62728		1e-06	-13.8155	0.39	-0.941609
5.48	1.70111	1e-06	-13.8155		5.58	1.71919	14.99	2.70738
5.21	1.65058	13.75	2.62104		4.56	1.51732	22.3	3.10459
10.52	2.35328	1.29	0.254642		11.45	2.43799	10.86	2.38509
12.77	2.5471	33.46	3.51035		8.71	2.16447	1e-06	-13.8155
0.36	-1.02165	10.11	2.31353		5.95	1.78339	8.53	2.14359
0.39	-0.941609	0.01	-4.60517		21.17	3.05259	1e-06	-13.8155
11.31	2.42569	6.54	1.87794		15.47	2.7389	2.29	0.828552
1e-06	-13.8155	17.86	2.88256		0.21	-1.56065	10.96	2.39425
0.03	-3.50656	4.49	1.50185		0.01	-4.60517	1.28	0.24686
17.78	2.87807	4.05	1.39872		14.7	2.68785	0.01	-4.60517
35.11	3.55849	1.59	0.463734		0.65	-0.430783	4.05	1.39872
0.27	-1.30933	1.51	0.41211		5.12	1.63315	5.73	1.74572
1.25	0.223144	5.57	1.7174		1e-06	-13.8155	0.38	-0.967584
0.26	-1.34707	0.98	-0.0202027		0.13	-2.04022	4.99	1.60744
9.25	2.22462	3.14	1.14422		0.04	-3.21888	33.02	3.49711
4.87	1.58309	11.89	2.4757		6.55	1.87947	1e-06	-13.8155
1e-06	-13.8155	0.32	-1.13943		2.7	0.993252	9.08	2.20607
0.19	-1.66073	14.29	2.65956		0.74	-0.301105	0.65	-0.430783
1e-06	-13.8155	1e-06	-13.8155		0.11	-2.20727	15.17	2.71932
32.9	3.49347	1e-06	-13.8155		1e-06	-13.8155	0.01	-4.60517
9.45	2.24601	0.83	-0.18633		21.47	3.06666	29.87	3.39685
10.48	2.34947	0.63	-0.462035		0.86	-0.150823	0.95	-0.0512933
0.06	-2.81341	7.52	2.01757		15.74	2.75621	16.93	2.82909
6.57	1.88251	16.93	2.82909		23.6	3.16125	2.48	0.908259
9.6	2.26176	2.25	0.81093		3.58	1.27536	6.93	1.93586
0.08	-2.52573	0.82	-0.198451		10.85	2.38417	0.55	-0.597837
12.7	2.5416	0.66	-0.415515		0.72	-0.328504	1.96	0.672944
7.99	2.07819	29.1	3.37074		1e-06	-13.8155	7.32	1.99061
11.22	2.4177	4.58	1.5217		0.11	-2.20727	16.67	2.81361
0.49	-0.71335	8.66	2.15871		8.2	2.10413	0.82	-0.198451
0.46	-0.776529	0.78	-0.248461		12.91	2.558	5.92	1.77834
30.38	3.41378	5	1.60944		15.65	2.75047	22.27	3.10324
8.48	2.13771	11.42	2.43537		0.12	-2.12026	6.42	1.85942
1e-06	-13.8155	0.13	-2.04022		0.07	-2.65926	16.17	2.78316
0.16	-1.83258	13.27	2.58551		16.21	2.78563	2.12	0.751416
2.68	0.985817	0.33	-1.10866		5.69	1.73871	0.16	-1.83258
28.56	3.35201	11.34	2.42834		13.41	2.596	7.3	1.98787
0.2	-1.60944	9.14	2.21266		0.01	-4.60517	2.62	0.963174
1.32	0.277632	11.47	2.43973		1e-06	-13.8155	8.47	2.13653
22.78	3.12588	9.51	2.25234		1e-06	-13.8155	9.77	2.27932
1.87	0.625938	0.01	-4.60517		31.21	3.44074	29.52	3.38507
0.58	-0.544727	6	1.79176		1.2	0.182322	8.11	2.0931
0.4	-0.916291	7.3	1.98787		5.39	1.68455	0.35	-1.04982
16.08	2.77758	0.55	-0.597837		12.93	2.55955	6.56	1.88099
0.29	-1.23787	0.04	-3.21888		1.06	0.0582689	4.47	1.49739
1e-06	-13.8155	16.41	2.79789		7.33	1.99198	2.99	1.09527
11.3	2.4248	8.36	2.12346		7.83	2.05796	2.45	0.896088
0.06	-2.81341	2.7	0.993252		2.74	1.00796	1e-06	-13.8155
15.29	2.7272	4.5	1.50408		14.63	2.68307	21.6	3.07269
5.7	1.74047	0.41	-0.891598		2.25	0.81093	8.23	2.10779
6.39	1.85473	0.3	-1.20397		0.44	-0.820981	1e-06	-13.8155
0.46	-0.776529	1e-06	-13.8155		10.81	2.38047	16.83	2.82316
11.6	2.45101	13.36	2.59227		29.15	3.37245	7.37	1.99742
0.17	-1.77196	0.1	-2.30259		4.03	1.39377	3.14	1.14422
0.8	-0.223144	0.41	-0.891598		15.58	2.74599	2	0.693147
31.7	3.45632	0.88	-0.127833		2.43	0.887891	1.31	0.270027
1e-06	-13.8155	4.49	1.50185		1e-06	-13.8155	6.86	1.92571
13.04	2.56802	1e-06	-13.8155		19.76	2.98366	6.75	1.90954
5.62	1.72633	15.34	2.73046		25.4	3.23475	0.3	-1.20397
6.08	1.805	14.2	2.65324		6.1	1.80829	1e-06	-13.8155
17.8	2.8792	1.13	0.122218		8.91	2.18717	7.38	1.99877
0.2	-1.60944	1.9	0.641854		3.45	1.23837	15.08	2.71337
0.01	-4.60517	2.13	0.756122		3.12	1.13783	1.21	0.19062
1e-06	-13.8155	0.06	-2.81341		3.48	1.24703	1e-06	-13.8155
0.18	-1.7148	1e-06	-13.8155		0.89	-0.116534	4.9	1.58924
6.59	1.88555	14.34	2.66305		26.52	3.2779	1e-06	-13.8155
0.8	-0.223144	18.17	2.89977		30.93	3.43173	0.48	-0.733969
5.12	1.63315	1.86	0.620576		0.05	-2.99573	27.97	3.33113
0.34	-1.07881	0.15	-1.89712		0.94	-0.0618754	8.07	2.08815
0.11	-2.20727	1.3	0.262364		1e-06	-13.8155	1e-06	-13.8155
0.4	-0.916291	11.55	2.44669		2.45	0.896088	0.37	-0.994252
2.01	0.698135	2.85	1.04732		0.17	-1.77196	0.48	-0.733969
1.37	0.314811	0.59	-0.527633		0.03	-3.50656	0.39	-0.941609
0.94	-0.0618754	0.45	-0.798508		16.39	2.79667	9.36	2.23645
18.76	2.93173	4.82	1.57277		0.27	-1.30933	2.93	1.075
8.21	2.10535	6.62	1.8901		0.22	-1.51413	1e-06	-13.8155
4.75	1.55814	7.87	2.06306		0.34	-1.07881	20.92	3.04071
0.12	-2.12026	12.58	2.53211		7.84	2.05924	0.23	-1.46968
6.4	1.8563	1e-06	-13.8155		2	0.693147	0.49	-0.71335
10.1	2.31254	1.13	0.122218		4.71	1.54969	12.94	2.56032
5.07	1.62334	0.38	-0.967584		15.26	2.72524	1e-06	-13.8155
8.69	2.16217	0.01	-4.60517		2.53	0.928219	0.02	-3.91202
9.49	2.25024	4.84	1.57691		2.93	1.075	23.95	3.17597
5.61	1.72455	0.38	-0.967584		0.55	-0.597837	3.35	1.20896
1e-06	-13.8155	7.62	2.03078		0.32	-1.13943	0.87	-0.139262
6.04	1.7984	0.2	-1.60944		12.78	2.54788	3.84	1.34547
11	2.3979	1.11	0.10436		6.92	1.93442	0.63	-0.462035
3.15	1.1474	0.11	-2.20727		9.63	2.26488	1e-06	-13.8155
0.43	-0.84397	0.32	-1.13943		1.7	0.530628	0.34	-1.07881
9.8	2.28238	27.65	3.31963		1e-06	-13.8155	0.68	-0.385662
4.56	1.51732	0.14	-1.96611		13.87	2.62973	0.01	-4.60517
15	2.70805	0.02	-3.91202		6.19	1.82294	10.7	2.37024
6.5	1.8718	2.03	0.708036		0.11	-2.20727	11.66	2.45616
17.61	2.86847	1e-06	-13.8155		15.52	2.74213	2.75	1.0116
0.79	-0.235722	11.67	2.45702		0.05	-2.99573	35.55	3.57094
16.28	2.78994	13.15	2.57642		0.65	-0.430783	0.08	-2.52573
7.45	2.00821	9.93	2.29556		1.52	0.41871	6.18	1.82132
0.07	-2.65926	4.7	1.54756		13.43	2.59749	1e-06	-13.8155
4.8	1.56862	1.19	0.173953		0.3	-1.20397	0.02	-3.91202
0.28	-1.27297	0.33	-1.10866		1e-06	-13.8155	13.72	2.61885
0.51	-0.673345	16.15	2.78192		1e-06	-13.8155	31.81	3.45978
0.15	-1.89712	18.89	2.93863		18.5	2.91777	6.4	1.8563
28.5	3.3499	8.15	2.09802		0.33	-1.10866	0.02	-3.91202
22.81	3.1272	8.83	2.17816		8.97	2.19389	5.21	1.65058
1e-06	-13.8155	0.81	-0.210721		0.03	-3.50656	1e-06	-13.8155
0.73	-0.314711	1e-06	-13.8155		0.84	-0.174353	0.15	-1.89712
0.15	-1.89712	1e-06	-13.8155		4.33	1.46557	0.04	-3.21888
0.12	-2.12026	3.2	1.16315		13.82	2.62612	22.66	3.1206
0.01	-4.60517	16.52	2.80457		1.8	0.587787	11.93	2.47906
4.24	1.44456	0.67	-0.400478		1.69	0.524729	21.67	3.07593
1e-06	-13.8155	0.54	-0.616186		3.36	1.21194	11.98	2.48324
10.78	2.37769	10.13	2.3155		0.73	-0.314711	8.22	2.10657
11.18	2.41413	0.5	-0.693147		15.11	2.71536	10.09	2.31154
1.22	0.198851	1e-06	-13.8155		0.27	-1.30933	1.33	0.285179
0.55	-0.597837	0.16	-1.83258		13.44	2.59824	5.01	1.61144
4.21	1.43746	23.97	3.1768		0.43	-0.84397	10.52	2.35328
1e-06	-13.8155	0.75	-0.287682		10.84	2.38324	5.29	1.66582
0.33	-1.10866	5.35	1.6771		1e-06	-13.8155	0.85	-0.162519
1e-06	-13.8155	1e-06	-13.8155		16.13	2.78068	14.46	2.67139
1.91	0.647103	0.85	-0.162519		14.34	2.66305	0.6	-0.510826
1.17	0.157004	0.13	-2.04022		0.13	-2.04022	0.01	-4.60517
0.55	-0.597837	7.8	2.05412		25.83	3.25154	2.67	0.982078
3.78	1.32972	1.77	0.57098		16.75	2.8184	3.32	1.19996
0.02	-3.91202	2.62	0.963174		3.53	1.2613	0.05	-2.99573
10.06	2.30857	1e-06	-13.8155		0.28	-1.27297	0.69	-0.371064
6.51	1.87334	1.98	0.683097		0.43	-0.84397	22.44	3.11085
0.27	-1.30933	0.03	-3.50656		0.63	-0.462035	1e-06	-13.8155
9.06	2.20387	0.1	-2.30259		2.76	1.01523	7.95	2.07317
0.3	-1.20397	1e-06	-13.8155		0.11	-2.20727	1.34	0.29267
0.11	-2.20727	1.24	0.215111		13.8	2.62467	0.03	-3.50656
5.47	1.69928	4.68	1.5433		5.07	1.62334	20.02	2.99673
13.64	2.61301	1e-06	-13.8155		16.05	2.77571	3.73	1.31641
9.61	2.2628	0.08	-2.52573		0.79	-0.235722	7.62	2.03078
0.51	-0.673345	1e-06	-13.8155		12.72	2.54318	0.23	-1.46968
9.2	2.2192	29.68	3.39047		11.91	2.47738	1.42	0.350657
0.04	-3.21888	0.02	-3.91202		26.2	3.26576	0.37	-0.994252
11.24	2.41948	1.68	0.518794		2.49	0.912283	1.24	0.215111
8.47	2.13653	14.9	2.70136		6.22	1.82777	1.18	0.165514
0.04	-3.21888	8.69	2.16217		0.79	-0.235722	1e-06	-13.8155
9.66	2.26799	0.53	-0.634878		1.06	0.0582689	3.56	1.26976
1e-06	-13.8155	19.14	2.95178		0.14	-1.96611	11.59	2.45014
0.01	-4.60517	7.57	2.02419		0.01	-4.60517	7.35	1.9947
4.69	1.54543	0.7	-0.356675		18.31	2.90745	4.4	1.4816
13.08	2.57108	0.75	-0.287682		0.1	-2.30259	1e-06	-13.8155
5.07	1.62334	4.58	1.5217		1.07	0.0676586	0.21	-1.56065
0.48	-0.733969	15.38	2.73307		0.01	-4.60517	11.58	2.44928
0.02	-3.91202	1e-06	-13.8155		0.26	-1.34707	0.03	-3.50656
0.18	-1.7148	1.31	0.270027		1.17	0.157004	7.6	2.02815
0.22	-1.51413	0.86	-0.150823		12.97	2.56264	0.25	-1.38629
13.93	2.63404	0.34	-1.07881		3.65	1.29473	0.01	-4.60517
22.1	3.09558	0.08	-2.52573		0.3	-1.20397	2.06	0.722706
7.17	1.96991	2.73	1.0043		18.95	2.9418	7.6	2.02815
1e-06	-13.8155	0.19	-1.66073		0.16	-1.83258	9.81	2.2834
14.17	2.65113	22.75	3.12457		0.37	-0.994252	0.03	-3.50656
17.46	2.85991	0.03	-3.50656		0.24	-1.42712	11.29	2.42392
1e-06	-13.8155	1e-06	-13.8155		0.45	-0.798508	4.32	1.46326
1.71	0.536493	9.46	2.24707		10.78	2.37769	0.31	-1.17118
2.55	0.936093	1e-06	-13.8155		0.28	-1.27297	6.18	1.82132
23.39	3.15231	13.36	2.59227		3.06	1.11841	2.22	0.797507
1.04	0.0392207	1e-06	-13.8155		2.02	0.703098	14.05	2.64262
7.49	2.01357	17.03	2.83498		1.15	0.139762	0.03	-3.50656
28.48	3.3492	2.27	0.81978		0.82	-0.198451	0.45	-0.798508
1e-06	-13.8155	0.4	-0.916291		6.74	1.90806	0.27	-1.30933
5.72	1.74397	9.07	2.20497		1.61	0.476234	14.53	2.67622
1.93	0.65752	6.53	1.87641		7	1.94591	8.57	2.14827
0.33	-1.10866	0.38	-0.967584		2.73	1.0043	14.44	2.67
9.47	2.24813	0.22	-1.51413		10.83	2.38232	2.39	0.871293
14.73	2.68989	0.6	-0.510826		8.47	2.13653	1e-06	-13.8155
13.34	2.59077	6.07	1.80336		23.85	3.17178	1e-06	-13.8155
4.91	1.59127	1e-06	-13.8155		1e-06	-13.8155	0.22	-1.51413
4.93	1.59534	5.63	1.72811		3.62	1.28647	7.37	1.99742
1e-06	-13.8155	1e-06	-13.8155		37.22	3.61685	0.04	-3.21888
0.12	-2.12026	16.9	2.82731		1e-06	-13.8155	11.61	2.45187
7.32	1.99061	1.86	0.620576		0.51	-0.673345	1e-06	-13.8155
10.63	2.36368	7.86	2.06179		7.44	2.00687	1.56	0.444686
1.17	0.157004	6.12	1.81156		0.04	-3.21888	0.87	-0.139262
7.92	2.06939	21.48	3.06712		10.54	2.35518	6.62	1.8901
1.2	0.182322	1e-06	-13.8155		54.52	3.99857	2.62	0.963174
0.07	-2.65926	0.91	-0.0943107		1e-06	-13.8155	12.61	2.53449
0.05	-2.99573	1e-06	-13.8155		1.05	0.0487902	11.27	2.42214
19.66	2.97859	16.5	2.80336		6.95	1.93874	15.04	2.71071
0.92	-0.0833816	3.05	1.11514		8.3	2.11626	0.01	-4.60517
21.75	3.07961	0.03	-3.50656		1.41	0.34359	20.03	2.99723
5.45	1.69562	0.09	-2.40795		0.63	-0.462035	6.57	1.88251
1e-06	-13.8155	21.2	3.054		7.76	2.04898	1e-06	-13.8155
4.38	1.47705	0.05	-2.99573		0.18	-1.7148	22.86	3.12939
12.31	2.51041	5.84	1.76473		8.8	2.17475	18.04	2.89259
9.76	2.27829	0.69	-0.371064		0.2	-1.60944	11.47	2.43973
16.11	2.77944	0.34	-1.07881		5.88	1.77156	14.08	2.64476
8.2	2.10413	15.76	2.75748		10.49	2.35042	0.25	-1.38629
0.22	-1.51413	0.56	-0.579818		1.91	0.647103	2.23	0.802002
0.04	-3.21888	0.04	-3.21888		13.55	2.60639	0.23	-1.46968
0.09	-2.40795	10.22	2.32435		6.11	1.80993	3.21	1.16627
15.21	2.72195	0.02	-3.91202		0.03	-3.50656	5.13	1.63511
1.53	0.425268	3.31	1.19695		0.38	-0.967584	8.43	2.1318
0.03	-3.50656	4.03	1.39377		1.97	0.678034	1.65	0.500775
0.14	-1.96611	7.16	1.96851		6.61	1.88858	0.08	-2.52573
22.46	3.11174	13.14	2.57566		0.06	-2.81341	0.34	-1.07881
9.59	2.26072	10.6	2.36085		1.35	0.300105	0.32	-1.13943
8.15	2.09802	7.56	2.02287		16.71	2.81601	2.22	0.797507
5.19	1.64673	1.33	0.285179		22.4	3.10906	0.01	-4.60517
0.45	-0.798508	4.4	1.4816		28.05	3.33399	11.14	2.41054
1.73	0.548121	0.14	-1.96611		13.38	2.59376	9.84	2.28646
7.34	1.99334	0.55	-0.597837		0.99	-0.0100503	11.18	2.41413
7.16	1.96851	0.12	-2.12026		15.24	2.72392	0.68	-0.385662
11.59	2.45014	16.65	2.81241		2.2	0.788457	13.2	2.58022
1.06	0.0582689	0.23	-1.46968		3.4	1.22378	0.09	-2.40795
10.25	2.32728	20.56	3.02335		1.73	0.548121	14.2	2.65324
9.76	2.27829	3.51	1.25562		0.51	-0.673345	0.26	-1.34707
0.16	-1.83258	19.94	2.99273		4.41	1.48387	2.08	0.732368
6.05	1.80006	3.23	1.17248		2.92	1.07158	0.54	-0.616186
0.23	-1.46968	0.49	-0.71335		10.81	2.38047	1.8	0.587787
14.38	2.66584	3.4	1.22378		0.51	-0.673345	1.19	0.173953
0.48	-0.733969	2.34	0.850151		3.01	1.10194	0.35	-1.04982
3.05	1.11514	13.36	2.59227		8.5	2.14007	0.27	-1.30933
4.89	1.58719	8.65	2.15756		10.99	2.39699	0.51	-0.673345
1e-06	-13.8155	1.69	0.524729		1.58	0.457425	4.9	1.58924
4.4	1.4816	9.65	2.26696		34.44	3.53922	0.2	-1.60944
0.41	-0.891598	1.29	0.254642		1.03	0.0295588	4.25	1.44692
0.16	-1.83258	1e-06	-13.8155		1e-06	-13.8155	0.35	-1.04982
9.01	2.19834	11.07	2.40424		16.78	2.82019	14.33	2.66236
10.94	2.39243	6.84	1.92279		4.65	1.53687	13.14	2.57566
0.12	-2.12026	8.24	2.109		17.27	2.84897	3.82	1.34025
0.5	-0.693147	2.5	0.916291		10.82	2.3814	10.16	2.31846
0.12	-2.12026	1.79	0.582216		26.82	3.28915	28.96	3.36592
0.01	-4.60517	0.44	-0.820981		14.08	2.64476	1e-06	-13.8155
1.69	0.524729	0.47	-0.755023		25.75	3.24843	0.73	-0.314711
1e-06	-13.8155	1e-06	-13.8155		11.53	2.44495	11.99	2.48407
0.08	-2.52573	6.52	1.87487		1.18	0.165514	1e-06	-13.8155
0.07	-2.65926	31.84	3.46072		0.18	-1.7148	18.57	2.92155
0.64	-0.446287	1.64	0.494696		13.02	2.56649	5.97	1.78675
1e-06	-13.8155	10.57	2.35802		0.03	-3.50656	1.91	0.647103
1.59	0.463734	1.74	0.553885		1.41	0.34359	6.08	1.805
2.18	0.779325	3.8	1.335		0.01	-4.60517	3.2	1.16315
0.02	-3.91202	0.02	-3.91202		6.32	1.84372	6.2	1.82455
0.84	-0.174353	0.04	-3.21888		21.35	3.06105	0.05	-2.99573
0.41	-0.891598	0.22	-1.51413		35.92	3.58129	15.65	2.75047
10.58	2.35897	1e-06	-13.8155		0.08	-2.52573	0.5	-0.693147
11.24	2.41948	0.68	-0.385662		2.31	0.837248	8.06	2.08691
4.17	1.42792	0.77	-0.261365		1e-06	-13.8155	0.04	-3.21888
0.47	-0.755023	1e-06	-13.8155		10.31	2.33311	5.16	1.64094
0.46	-0.776529	0.31	-1.17118		0.05	-2.99573	7.83	2.05796
1e-06	-13.8155	46.02	3.82908		10.8	2.37955	12.82	2.55101
0.57	-0.562119	0.06	-2.81341		13	2.56495	0.58	-0.544727
1e-06	-13.8155	0.22	-1.51413		7.7	2.04122	0.18	-1.7148
0.09	-2.40795	0.03	-3.50656		11.07	2.40424	1.76	0.565314
1.05	0.0487902	3.86	1.35067		0.13	-2.04022	1e-06	-13.8155
6.86	1.92571	14.66	2.68512		1.47	0.385262	1.78	0.576613
37.48	3.62381	17.51	2.86277		23.4	3.15274	6.05	1.80006
6.96	1.94018	6.9	1.93152		14.36	2.66445	0.03	-3.50656
5.89	1.77326	14.16	2.65042		13.7	2.6174	2.45	0.896088
1e-06	-13.8155	1e-06	-13.8155		0.25	-1.38629	1.14	0.131028
8.14	2.09679	3.18	1.15688		2.61	0.95935	3.2	1.16315
17.82	2.88032	0.06	-2.81341		3.99	1.38379	10.09	2.31154
0.85	-0.162519	0.38	-0.967584		2.31	0.837248	1.07	0.0676586
9.92	2.29455	0.14	-1.96611		2.79	1.02604	12.69	2.54081
5.49	1.70293	3.19	1.16002		11.07	2.40424	5.48	1.70111
1e-06	-13.8155	22.35	3.10683		5.88	1.77156	1e-06	-13.8155
13.11	2.57338	1e-06	-13.8155		14.92	2.7027	1e-06	-13.8155
2.03	0.708036	0.07	-2.65926		5.98	1.78842	1.86	0.620576
3.28	1.18784	7.6	2.02815		0.02	-3.91202	11.57	2.44842
0.24	-1.42712	27.58	3.31709		0.23	-1.46968	0.03	-3.50656
24.84	3.21246	1e-06	-13.8155		3.26	1.18173	0.69	-0.371064
0.25	-1.38629	9.75	2.27727		0.21	-1.56065	0.05	-2.99573
7.41	2.00283	9.03	2.20055		0.32	-1.13943	11.19	2.41502
21.79	3.08145	1e-06	-13.8155		0.37	-0.994252	7.08	1.95727
25.99	3.25771	0.06	-2.81341		25.88	3.25347	10.1	2.31254
0.56	-0.579818	0.33	-1.10866		11.21	2.41681	0.05	-2.99573
8.52	2.14242	0.55	-0.597837		11.63	2.45359	0.16	-1.83258
0.14	-1.96611	6.16	1.81808		9.14	2.21266	12.17	2.49897
2.61	0.95935	3.55	1.26695		0.09	-2.40795	0.36	-1.02165
0.38	-0.967584	0.01	-4.60517		1.75	0.559616	3.2	1.16315
19.2	2.95491	6.66	1.89612		1.5	0.405465	2.37	0.86289
12.06	2.48989	0.55	-0.597837		19.27	2.95855	21.45	3.06572
8.02	2.08194	4.05	1.39872		0.14	-1.96611	0.71	-0.34249
8.25	2.11021	4.65	1.53687		0.03	-3.50656	11.48	2.44061
2.17	0.774727	11.41	2.43449		25.56	3.24103	0.56	-0.579818
1e-06	-13.8155	0.08	-2.52573		15.87	2.76443	0.03	-3.50656
0.01	-4.60517	8.54	2.14476		4.47	1.49739	1	0
5.88	1.77156	0.54	-0.616186		0.17	-1.77196	10.57	2.35802
0.95	-0.0512933	7.8	2.05412		3.63	1.28923	1.7	0.530628
13	2.56495	6.42	1.85942		4.27	1.45161	5.82	1.7613
0.86	-0.150823	0.34	-1.07881		1	0	0.16	-1.83258
1.28	0.24686	0.21	-1.56065		4.68	1.5433	18.97	2.94286
14.06	2.64333	2.22	0.797507		1e-06	-13.8155	3.58	1.27536
0.89	-0.116534	1.44	0.364643		13.51	2.60343	8.62	2.15409
15.31	2.72851	1e-06	-13.8155		11.36	2.4301	14.54	2.6769
0.04	-3.21888	1e-06	-13.8155		20.81	3.03543	20.49	3.01994
13.42	2.59675	6.78	1.91398		29.25	3.37588	2.02	0.703098
1e-06	-13.8155	10.43	2.34469		6.45	1.86408	0.89	-0.116534
0.76	-0.274437	1.24	0.215111		0.33	-1.10866	0.34	-1.07881
12.65	2.53766	1.08	0.076961		23.63	3.16252	3.69	1.30563
0.36	-1.02165	9.16	2.21485		0.01	-4.60517	2.91	1.06815
4.08	1.4061	0.38	-0.967584		1.12	0.113329	9.96	2.29858
0.22	-1.51413	1.44	0.364643		11.36	2.4301	5.63	1.72811
5.54	1.71199	0.1	-2.30259		8.03	2.08318	0.28	-1.27297
0.37	-0.994252	5.95	1.78339		4.53	1.51072	1.27	0.239017
0.07	-2.65926	1e-06	-13.8155		11.31	2.42569	7.63	2.03209
2.59	0.951658	1.87	0.625938		2.84	1.0438	4.92	1.59331
0.14	-1.96611	5.63	1.72811		7.24	1.97962	0.49	-0.71335
20.94	3.04166	3.39	1.22083		0.01	-4.60517	1.35	0.300105
19.57	2.974	0.5	-0.693147		0.59	-0.527633	17.6	2.8679
17.46	2.85991	0.28	-1.27297		8.64	2.1564	3.62	1.28647
16.05	2.77571	1e-06	-13.8155		0.28	-1.27297	1e-06	-13.8155
5.22	1.6525	1e-06	-13.8155		0.69	-0.371064	0.45	-0.798508
0.03	-3.50656	10.94	2.39243		5.71	1.74222	18.93	2.94075
0.32	-1.13943	0.6	-0.510826		8.64	2.1564	0.85	-0.162519
7.48	2.01223	0.05	-2.99573		0.99	-0.0100503	10.98	2.39608
2.85	1.04732	0.76	-0.274437		0.46	-0.776529	1.02	0.0198026
3.33	1.20297	2.78	1.02245		17.37	2.85474	1e-06	-13.8155
0.73	-0.314711	10.28	2.3302		17.67	2.87187	16.15	2.78192
8.56	2.1471	0.18	-1.7148		0.66	-0.415515	4.53	1.51072
8.69	2.16217	0.16	-1.83258		5.23	1.65441	6.93	1.93586
4.1	1.41099	0.48	-0.733969		7	1.94591	28.99	3.36695
0.09	-2.40795	3.21	1.16627		0.22	-1.51413	0.58	-0.544727
0.07	-2.65926	1.21	0.19062		4.35	1.47018	1.88	0.631272
12.07	2.49072	21.45	3.06572		0.03	-3.50656	1e-06	-13.8155
10.39	2.34084	3.94	1.37118		1.23	0.207014	3.4	1.22378
20.25	3.00815	0.02	-3.91202		17.76	2.87695	13.07	2.57032
8.18	2.10169	0.06	-2.81341		3.31	1.19695	0.96	-0.040822
0.01	-4.60517	11.29	2.42392		14.42	2.66862	0.23	-1.46968
6.61	1.88858	11.56	2.44755		1e-06	-13.8155	1.33	0.285179
7.47	2.01089	0.13	-2.04022		7.98	2.07694	0.16	-1.83258
0.85	-0.162519	11.85	2.47233		0.36	-1.02165	6.2	1.82455
1e-06	-13.8155	0.36	-1.02165		8.83	2.17816	9.11	2.20937
4.91	1.59127	15.2	2.7213		5.35	1.6771	12.11	2.49403
0.32	-1.13943	9.2	2.2192		2.33	0.845868	8.68	2.16102
1.95	0.667829	0.67	-0.400478		5.08	1.62531	0.84	-0.174353
1e-06	-13.8155	16.24	2.78748		4.78	1.56444	5.74	1.74746
0.25	-1.38629	0.7	-0.356675		8.98	2.195	0.92	-0.0833816
5.41	1.68825	0.09	-2.40795		5.89	1.77326	4.19	1.4327
2.04	0.71295	4.13	1.41828		7.22	1.97685	0.04	-3.21888
0.49	-0.71335	14.28	2.65886		16.01	2.77321	0.04	-3.21888
0.45	-0.798508	5.43	1.69194		1e-06	-13.8155	0.07	-2.65926
0.3	-1.20397	0.11	-2.20727		0.01	-4.60517	4.01	1.38879
8.73	2.16677	9.94	2.29657		0.05	-2.99573	1e-06	-13.8155
23.99	3.17764	23.09	3.1394		11.37	2.43098	26.29	3.26919
0.05	-2.99573	10.02	2.30458		0.39	-0.941609	1e-06	-13.8155
5.44	1.69378	9.08	2.20607		0.18	-1.7148	41.23	3.71917
0.02	-3.91202	0.05	-2.99573		12.14	2.49651	0.41	-0.891598
3.53	1.2613	1.12	0.113329		8.47	2.13653	0.08	-2.52573
5.02	1.61343	7.67	2.03732		0.26	-1.34707	0.71	-0.34249
10.68	2.36837	0.04	-3.21888		0.91	-0.0943107	21.46	3.06619
18.7	2.92852	1.43	0.357674		13.28	2.58626	11.18	2.41413
5.1	1.62924	1e-06	-13.8155		1e-06	-13.8155	0.01	-4.60517
10.43	2.34469	20.72	3.0311		0.25	-1.38629	29.77	3.3935
19.49	2.9699	0.41	-0.891598		1e-06	-13.8155	0.39	-0.941609
0.28	-1.27297	1e-06	-13.8155		2.3	0.832909	0.34	-1.07881
6.28	1.83737	1.71	0.536493		8.54	2.14476	0.66	-0.415515
0.68	-0.385662	0.6	-0.510826		1.45	0.371564	7.25	1.981
13.86	2.62901	0.04	-3.21888		21.62	3.07362	8.85	2.18042
10.17	2.31944	3.58	1.27536		5.07	1.62334	3.2	1.16315
16.2	2.78501	1e-06	-13.8155		0.1	-2.30259	12.01	2.48574
10.37	2.33892	0.15	-1.89712		10.58	2.35897	1.63	0.48858
1e-06	-13.8155	5.09	1.62728		22.87	3.12983	1.43	0.357674
0.82	-0.198451	12.15	2.49733		0.05	-2.99573	3.96	1.37624
0.86	-0.150823	6.75	1.90954		13.07	2.57032	16.71	2.81601
0.18	-1.7148	0.95	-0.0512933		2.3	0.832909	1e-06	-13.8155
3.56	1.26976	0.17	-1.77196		4.57	1.51951	28.14	3.33719
0.96	-0.040822	0.2	-1.60944		18.47	2.91615	3.55	1.26695
2.17	0.774727	2.81	1.03318		8.79	2.17361	11.53	2.44495
1.75	0.559616	3.09	1.12817		0.48	-0.733969	20.12	3.00171
0.03	-3.50656	0.03	-3.50656		16.57	2.80759	3.61	1.28371
10.97	2.39516	2.39	0.871293		8.87	2.18267	2.65	0.97456
0.16	-1.83258	0.16	-1.83258		12.39	2.51689	3.67	1.30019
1e-06	-13.8155	0.6	-0.510826		0.15	-1.89712	24.31	3.19089
3.18	1.15688	0.63	-0.462035		11.98	2.48324	21.95	3.08877
1e-06	-13.8155	11.5	2.44235		2.81	1.03318	1e-06	-13.8155
1.99	0.688135	1e-06	-13.8155		0.25	-1.38629	0.5	-0.693147
29.12	3.37143	5.63	1.72811		18.43	2.91398	16.21	2.78563
0.33	-1.10866	23.39	3.15231		12.28	2.50797	0.01	-4.60517
8.82	2.17702	0.87	-0.139262		0.38	-0.967584	0.23	-1.46968
0.09	-2.40795	5.85	1.76644		21.6	3.07269	5.69	1.73871
35.44	3.56784	0.19	-1.66073		20.85	3.03735	17.02	2.83439
1e-06	-13.8155	0.01	-4.60517		15.19	2.72064	0.58	-0.544727
1e-06	-13.8155	7.22	1.97685		25.15	3.22486	3.92	1.36609
8.01	2.08069	0.01	-4.60517		18.84	2.93598	27.2	3.30322
0.02	-3.91202	5.2	1.64866		17.9	2.8848	26.55	3.27903
0.31	-1.17118	3.31	1.19695		2.47	0.904218	15.05	2.71138
0.74	-0.301105	1e-06	-13.8155		21.14	3.05117	9.19	2.21812
22.65	3.12016	2.44	0.891998		15.41	2.73502	7.35	1.9947
0.02	-3.91202	1.54	0.431782		9.81	2.2834	6.99	1.94448
0.01	-4.60517	12.51	2.52653		8.53	2.14359	28.72	3.35759
1.76	0.565314	0.35	-1.04982		17.4	2.85647	0.55	-0.597837
3.21	1.16627	10.96	2.39425		23.45	3.15487	0.01	-4.60517
18.4	2.91235	1e-06	-13.8155		0.18	-1.7148	1e-06	-13.8155
6.82	1.91986	4.95	1.59939		5	1.60944	7.29	1.9865
0.28	-1.27297	0.01	-4.60517		0.04	-3.21888	9.67	2.26903
0.19	-1.66073	2.12	0.751416		12.89	2.55645	10.61	2.3618
0.29	-1.23787	1.35	0.300105		0.42	-0.867501	0.32	-1.13943
0.11	-2.20727	6.08	1.805		14.76	2.69192	0.14	-1.96611
0.09	-2.40795	0.02	-3.91202		1.21	0.19062	5.29	1.66582
2.23	0.802002	0.74	-0.301105		0.03	-3.50656	7.86	2.06179
0.09	-2.40795	10.64	2.36462		1.39	0.329304	3.92	1.36609
10.75	2.37491	0.46	-0.776529		13.6	2.61007	0.18	-1.7148
2.98	1.09192	0.02	-3.91202		3.36	1.21194	2.9	1.06471
2.44	0.891998	0.24	-1.42712		0.46	-0.776529	0.02	-3.91202
0.16	-1.83258	3.65	1.29473		3.77	1.32708	13.54	2.60565
0.12	-2.12026	15.71	2.7543		0.23	-1.46968	16.34	2.79362
3.95	1.37372	4.22	1.43984		0.41	-0.891598	0.94	-0.0618754
8.01	2.08069	0.43	-0.84397		0.02	-3.91202	0.23	-1.46968
0.42	-0.867501	17.31	2.85128		0.41	-0.891598	1e-06	-13.8155
0.55	-0.597837	18.31	2.90745		6.63	1.8916	0.7	-0.356675
1e-06	-13.8155	1e-06	-13.8155		0.25	-1.38629	8.03	2.08318
3.08	1.12493	0.63	-0.462035		13.79	2.62394	13.11	2.57338
23.82	3.17053	1.45	0.371564		1.23	0.207014	15.09	2.71403
9.66	2.26799	9.75	2.27727		0.01	-4.60517	1e-06	-13.8155
1.18	0.165514	10.94	2.39243		12.42	2.51931	2.06	0.722706
1.15	0.139762	3.12	1.13783		16.38	2.79606	1e-06	-13.8155
3.32	1.19996	22.35	3.10683		0.24	-1.42712	14.86	2.69867
8.77	2.17134	0.69	-0.371064		0.1	-2.30259	0.01	-4.60517
0.11	-2.20727	4.93	1.59534		3.51	1.25562	0.14	-1.96611
20.31	3.01111	2.97	1.08856		1e-06	-13.8155	0.77	-0.261365
0.52	-0.653926	3.92	1.36609		19.92	2.99172	1.29	0.254642
0.64	-0.446287	0.15	-1.89712		4.54	1.51293	0.01	-4.60517
8.81	2.17589	9.78	2.28034		3.15	1.1474	0.22	-1.51413
0.1	-2.30259	12.22	2.50307		1e-06	-13.8155	22.55	3.11574
2.51	0.920283	11.11	2.40785		2.32	0.841567	0.2	-1.60944
5.31	1.66959	20.02	2.99673		20.88	3.03879	1.1	0.0953102
11.23	2.41859	8.5	2.14007		2.11	0.746688	0.65	-0.430783
0.4	-0.916291	0.44	-0.820981		1e-06	-13.8155	3.21	1.16627
11.98	2.48324	0.02	-3.91202		1.04	0.0392207	1e-06	-13.8155
25.71	3.24688	4.41	1.48387		0.3	-1.20397	23.21	3.14458
0.3	-1.20397	2.65	0.97456		26.19	3.26538	0.44	-0.820981
0.6	-0.510826	0.34	-1.07881		1e-06	-13.8155	5.6	1.72277
1e-06	-13.8155	2.37	0.86289		0.01	-4.60517	0.24	-1.42712
1.96	0.672944	6.24	1.83098		0.03	-3.50656	11.7	2.45959
0.13	-2.04022	2.24	0.806476		10	2.30259	13.51	2.60343
0.03	-3.50656	1e-06	-13.8155		2.83	1.04028	30.06	3.4032
0.07	-2.65926	0.18	-1.7148		1e-06	-13.8155	0.38	-0.967584
19.49	2.9699	1e-06	-13.8155		0.31	-1.17118	8.06	2.08691
0.2	-1.60944	9.09	2.20717		0.56	-0.579818	14.24	2.65605
1e-06	-13.8155	1e-06	-13.8155		8.94	2.19054	16.48	2.80215
10.87	2.38601	2.82	1.03674		27.04	3.29732	21.01	3.045
1e-06	-13.8155	0.57	-0.562119		15.46	2.73826	0.04	-3.21888
13.17	2.57794	6.79	1.91545		7.68	2.03862	3.62	1.28647
0.52	-0.653926	0.16	-1.83258		0.41	-0.891598	0.04	-3.21888
0.17	-1.77196	0.07	-2.65926		15.55	2.74406	1e-06	-13.8155
1.05	0.0487902	0.58	-0.544727		0.13	-2.04022	12.33	2.51204
0.05	-2.99573	1e-06	-13.8155		36.68	3.60223	5.56	1.7156
4.18	1.43031	2.43	0.887891		3.49	1.2499	0.18	-1.7148
0.36	-1.02165	0.19	-1.66073		3.28	1.18784	1.17	0.157004
2.16	0.770108	12.24	2.50471		0.08	-2.52573	0.34	-1.07881
8.41	2.12942	1.13	0.122218		22.58	3.11706	0.34	-1.07881
14.04	2.64191	1.93	0.65752		12.7	2.5416	6.38	1.85317
6.63	1.8916	0.3	-1.20397		0.7	-0.356675	0.02	-3.91202
9.91	2.29354	2.08	0.732368		9.61	2.2628	22.21	3.10054
0.01	-4.60517	17.41	2.85704		2.16	0.770108	11.75	2.46385
0.24	-1.42712	11.65	2.45531		1.06	0.0582689	1e-06	-13.8155
0.05	-2.99573	0.13	-2.04022		0.17	-1.77196	0.65	-0.430783
0.72	-0.328504	9.92	2.29455		0.86	-0.150823	9.06	2.20387
7.63	2.03209	7.75	2.04769		8.4	2.12823	1.09	0.0861777
4.67	1.54116	3.34	1.20597		1.61	0.476234	0.3	-1.20397
7.12	1.96291	2.54	0.932164		0.27	-1.30933	0.75	-0.287682
10.53	2.35423	0.05	-2.99573		8.46	2.13535	9.79	2.28136
0.05	-2.99573	6.03	1.79675		0.28	-1.27297	5.01	1.61144
0.11	-2.20727	10	2.30259		0.14	-1.96611	11.41	2.43449
1e-06	-13.8155	4.37	1.47476		3.54	1.26413	1.83	0.604316
3.28	1.18784	0.14	-1.96611		1e-06	-13.8155	4.61	1.52823
16.47	2.80154	3.11	1.13462		5.42	1.6901	0.51	-0.673345
9.89	2.29152	1.38	0.322083		0.21	-1.56065	15.09	2.71403
5.25	1.65823	1e-06	-13.8155		8.53	2.14359	0.92	-0.0833816
3.28	1.18784	7.25	1.981		0.01	-4.60517	16.91	2.82791
19.86	2.98871	1.71	0.536493		7.45	2.00821	21.26	3.05683
0.24	-1.42712	0.41	-0.891598		0.59	-0.527633	1.3	0.262364
13.55	2.60639	9.8	2.28238		0.48	-0.733969	9.01	2.19834
1.69	0.524729	26.08	3.26117		5.5	1.70475	0.01	-4.60517
0.59	-0.527633	0.11	-2.20727		14.48	2.67277	0.31	-1.17118
0.11	-2.20727	8.57	2.14827		0.51	-0.673345	3.7	1.30833
9.58	2.25968	19.35	2.96269		2.66	0.978326	2.83	1.04028
15.78	2.75874	0.45	-0.798508		1.85	0.615186	34.11	3.52959
1.15	0.139762	1.43	0.357674		25.85	3.25231	1.2	0.182322
3.8	1.335	11.49	2.44148		28.82	3.36107	11.52	2.44408
0.16	-1.83258	16.63	2.81121		6.54	1.87794	14.06	2.64333
4.14	1.4207	0.22	-1.51413		0.6	-0.510826	0.54	-0.616186
15.26	2.72524	2.92	1.07158		4.86	1.58104	25.07	3.22167
12.85	2.55334	2.8	1.02962		1.69	0.524729	24.94	3.21647
3.17	1.15373	0.25	-1.38629		0.26	-1.34707	0.87	-0.139262
0.43	-0.84397	1e-06	-13.8155		0.16	-1.83258	4.96	1.60141
7.86	2.06179	20.33	3.0121		41.65	3.7293	16.32	2.79239
4.29	1.45629	14.89	2.70069		1e-06	-13.8155	4.99	1.60744
1.39	0.329304	0.16	-1.83258		0.34	-1.07881	0.3	-1.20397
2.16	0.770108	13.19	2.57946		17.46	2.85991	14.8	2.69463
3.69	1.30563	16.28	2.78994		2.62	0.963174	14.88	2.70002
6.54	1.87794	0.01	-4.60517		0.28	-1.27297	22.41	3.10951
5.84	1.76473	0.38	-0.967584		0.92	-0.0833816	13.7	2.6174
0.13	-2.04022	2.03	0.708036		0.3	-1.20397	0.68	-0.385662
0.98	-0.0202027	9.02	2.19944		13.08	2.57108	5.25	1.65823
2.71	0.996949	0.18	-1.7148		3.01	1.10194	0.01	-4.60517
0.55	-0.597837	2.32	0.841567		23.88	3.17304	7.86	2.06179
2.72	1.00063	2.98	1.09192		0.42	-0.867501	0.9	-0.105361
9.24	2.22354	3.18	1.15688		1e-06	-13.8155	3.22	1.16938
0.07	-2.65926	0.13	-2.04022		1.61	0.476234	1e-06	-13.8155
14.71	2.68853	11.43	2.43624		18.66	2.92638	12.62	2.53528
0.2	-1.60944	9.6	2.26176		0.57	-0.562119	13.37	2.59301
13.06	2.56955	11.23	2.41859		0.27	-1.30933	16.17	2.78316
0.44	-0.820981	1e-06	-13.8155		0.88	-0.127833	24.93	3.21607
4.3	1.45862	9.61	2.2628		0.99	-0.0100503	2	0.693147
0.1	-2.30259	5.16	1.64094		0.13	-2.04022	15.04	2.71071
9.97	2.29958	17.15	2.842		6.15	1.81645	1.43	0.357674
1e-06	-13.8155	0.1	-2.30259		0.11	-2.20727	4.56	1.51732
1.56	0.444686	1e-06	-13.8155		7.02	1.94876	6.52	1.87487
9.56	2.25759	1.26	0.231112		0.25	-1.38629	0.01	-4.60517
5.39	1.68455	1.23	0.207014		1e-06	-13.8155	13.28	2.58626
0.01	-4.60517	0.05	-2.99573		23.94	3.17555	0.36	-1.02165
10.35	2.33699	15.27	2.72589		0.46	-0.776529	16.62	2.81061
6.77	1.9125	0.08	-2.52573		0.04	-3.21888	11.38	2.43186
2.14	0.760806	0.17	-1.77196		10.3	2.33214	1.64	0.494696
3.65	1.29473	6.54	1.87794		7.94	2.07191	1.76	0.565314
7.33	1.99198	22.19	3.09964		0.52	-0.653926	1.02	0.0198026
2.52	0.924259	0.16	-1.83258		0.08	-2.52573	0.02	-3.91202
4.64	1.53471	1e-06	-13.8155		6.4	1.8563	0.1	-2.30259
4.13	1.41828	10.44	2.34564		9.77	2.27932	0.67	-0.400478
14.81	2.6953	0.1	-2.30259		22.71	3.12281	2.25	0.81093
0.13	-2.04022	2.73	1.0043		15.36	2.73177	1e-06	-13.8155
0.07	-2.65926	33.95	3.52489		7.91	2.06813	0.1	-2.30259
8.36	2.12346	0.14	-1.96611		10.45	2.3466	1.38	0.322083
4.67	1.54116	0.98	-0.0202027		0.02	-3.91202	1e-06	-13.8155
14.7	2.68785	0.01	-4.60517		15.36	2.73177	17.84	2.88144
0.38	-0.967584	0.11	-2.20727		5.26	1.66013	0.37	-0.994252
2.9	1.06471	0.15	-1.89712		10.59	2.35991	0.61	-0.494296
0.95	-0.0512933	9.5	2.25129		0.02	-3.91202	0.02	-3.91202
6.86	1.92571	0.02	-3.91202		0.14	-1.96611	11.75	2.46385
0.17	-1.77196	0.42	-0.867501		15.46	2.73826	3.67	1.30019
3.39	1.22083	0.09	-2.40795		12.34	2.51285	7.67	2.03732
0.19	-1.66073	21.03	3.04595		0.09	-2.40795	0.68	-0.385662
10.24	2.3263	0.07	-2.65926		8.43	2.1318	0.36	-1.02165
1.61	0.476234	29.71	3.39148		0.05	-2.99573	0.44	-0.820981
3.5	1.25276	1.39	0.329304		4.33	1.46557	0.35	-1.04982
20.52	3.0214	12.69	2.54081		12.03	2.4874	0.05	-2.99573
0.39	-0.941609	2.12	0.751416		27.17	3.30211	0.09	-2.40795
16.48	2.80215	0.39	-0.941609		14.02	2.64048	0.01	-4.60517
1e-06	-13.8155	23.18	3.14329		24.71	3.20721	14.73	2.68989
0.64	-0.446287	34.3	3.53515		0.91	-0.0943107	0.38	-0.967584
7.64	2.0334	2.98	1.09192		1.81	0.593327	4.07	1.40364
0.6	-0.510826	1e-06	-13.8155		3.01	1.10194	0.23	-1.46968
29.14	3.37211	0.35	-1.04982		1.48	0.392042	16.66	2.81301
0.36	-1.02165	1e-06	-13.8155		9.21	2.22029	1e-06	-13.8155
4.75	1.55814	1e-06	-13.8155		19.29	2.95959	3.62	1.28647
3.3	1.19392	0.61	-0.494296		3.26	1.18173	4.34	1.46787
1.7	0.530628	1e-06	-13.8155		9.64	2.26592	2.06	0.722706
0.85	-0.162519	10.97	2.39516		1.14	0.131028	2.97	1.08856
0.14	-1.96611	5.87	1.76985		0.11	-2.20727	5.14	1.63705
15.77	2.75811	16.16	2.78254		0.01	-4.60517	11.74	2.463
0.22	-1.51413	0.02	-3.91202		0.54	-0.616186	0.98	-0.0202027
2.04	0.71295	8.15	2.09802		1e-06	-13.8155	5.19	1.64673
0.13	-2.04022	0.44	-0.820981		10.78	2.37769	12.46	2.52252
12.71	2.54239	42.42	3.74762		0.51	-0.673345	0.52	-0.653926
0.61	-0.494296	1e-06	-13.8155		17.07	2.83732	9.19	2.21812
0.12	-2.12026	0.03	-3.50656		12.99	2.56418	3.08	1.12493
6.92	1.93442	0.08	-2.52573		20.66	3.0282	2.37	0.86289
4.35	1.47018	0.29	-1.23787		0.03	-3.50656	0.49	-0.71335
0.28	-1.27297	0.01	-4.60517		0.18	-1.7148	0.18	-1.7148
19.52	2.97144	26.99	3.29547		23.4	3.15274	7.53	2.0189
0.14	-1.96611	0.49	-0.71335		0.32	-1.13943	0.71	-0.34249
7.96	2.07443	38.17	3.64205		9.26	2.2257	2.75	1.0116
5.74	1.74746	6	1.79176		0.85	-0.162519	4.44	1.49065
6.06	1.80171	20.02	2.99673		11.87	2.47401	0.16	-1.83258
1.08	0.076961	0.47	-0.755023		7.61	2.02946	16.29	2.79055
10.47	2.34851	6.63	1.8916		16.21	2.78563	4.32	1.46326
10.69	2.36931	0.03	-3.50656		0.03	-3.50656	16.25	2.78809
0.52	-0.653926	0.08	-2.52573		0.19	-1.66073	0.04	-3.21888
15.11	2.71536	1e-06	-13.8155		0.02	-3.91202	0.72	-0.328504
0.6	-0.510826	7.87	2.06306		0.8	-0.223144	3.14	1.14422
4.76	1.56025	4.01	1.38879		0.01	-4.60517	0.4	-0.916291
7.63	2.03209	3.82	1.34025		0.04	-3.21888	11.35	2.42922
1.96	0.672944	31.18	3.43978		0.28	-1.27297	16.73	2.8172
5.25	1.65823	5.64	1.72988		0.18	-1.7148	0.44	-0.820981
0.58	-0.544727	9.68	2.27006		3.06	1.11841	5.15	1.639
0.39	-0.941609	5.4	1.6864		0.34	-1.07881	0.31	-1.17118
2.19	0.783902	0.06	-2.81341		10.59	2.35991	1e-06	-13.8155
0.05	-2.99573	6.22	1.82777		10.28	2.3302	2.51	0.920283
0.2	-1.60944	10.54	2.35518		3.78	1.32972	7.13	1.96431
0.29	-1.23787	1e-06	-13.8155		2.58	0.947789	6.69	1.90061
0.04	-3.21888	17.51	2.86277		10.5	2.35138	1.51	0.41211
4.67	1.54116	14.53	2.67622		0.81	-0.210721	0.29	-1.23787
4.68	1.5433	0.81	-0.210721		0.12	-2.12026	8.54	2.14476
12.15	2.49733	1e-06	-13.8155		1.63	0.48858	17.89	2.88424
4.11	1.41342	4.3	1.45862		0.34	-1.07881	15.64	2.74983
0.01	-4.60517	0.04	-3.21888		0.06	-2.81341	10.56	2.35707
1.34	0.29267	0.03	-3.50656		2.35	0.854415	15.35	2.73112
30.16	3.40652	14.09	2.64547		1e-06	-13.8155	5.7	1.74047
12.77	2.5471	4.73	1.55393		0.01	-4.60517	18.78	2.93279
17.95	2.88759	0.04	-3.21888		0.37	-0.994252	0.75	-0.287682
0.02	-3.91202	13.66	2.61447		0.12	-2.12026	7.36	1.99606
3.44	1.23547	21.86	3.08466		0.02	-3.91202	11.07	2.40424
0.27	-1.30933	0.59	-0.527633		1.88	0.631272	17.16	2.84258
0.07	-2.65926	22.01	3.0915		23.6	3.16125	10.49	2.35042
1.19	0.173953	0.01	-4.60517		0.27	-1.30933	10.6	2.36085
0.11	-2.20727	2.12	0.751416		0.14	-1.96611	0.31	-1.17118
1e-06	-13.8155	0.04	-3.21888		1.18	0.165514	0.3	-1.20397
9.87	2.2895	0.03	-3.50656		0.8	-0.223144	0.1	-2.30259
1e-06	-13.8155	0.5	-0.693147		0.22	-1.51413	0.05	-2.99573
0.05	-2.99573	4.95	1.59939		9.87	2.2895	13.43	2.59749
9.59	2.26072	1e-06	-13.8155		0.27	-1.30933	14.91	2.70203
8.03	2.08318	7.29	1.9865		0.73	-0.314711	3.51	1.25562
3.52	1.25846	1e-06	-13.8155		1.31	0.270027	20.39	3.01504
2.68	0.985817	11.35	2.42922		0.2	-1.60944	1.2	0.182322
32.37	3.47723	0.16	-1.83258		11.05	2.40243	6.73	1.90658
4.28	1.45395	15.01	2.70872		7.89	2.0656	5.69	1.73871
0.26	-1.34707	11.98	2.48324		8.74	2.16791	0.12	-2.12026
0.62	-0.478036	4.48	1.49962		1.47	0.385262	0.08	-2.52573
0.18	-1.7148	2.17	0.774727		12.16	2.49815	0.03	-3.50656
12.7	2.5416	0.02	-3.91202		0.02	-3.91202	17.92	2.88592
0.34	-1.07881	0.6	-0.510826		0.55	-0.597837	0.02	-3.91202
5.62	1.72633	3.28	1.18784		1e-06	-13.8155	1e-06	-13.8155
0.48	-0.733969	6.8	1.91692		0.41	-0.891598	0.97	-0.0304592
0.06	-2.81341	10.57	2.35802		2.84	1.0438	1e-06	-13.8155
0.26	-1.34707	1.53	0.425268		18.05	2.89315	0.81	-0.210721
0.54	-0.616186	7.15	1.96711		46.95	3.84908	0.28	-1.27297
0.04	-3.21888	0.06	-2.81341		8.49	2.13889	4.04	1.39624
25.95	3.25617	12.32	2.51122		1.11	0.10436	6.98	1.94305
6.87	1.92716	10.68	2.36837		10.79	2.37862	1.33	0.285179
2.96	1.08519	0.86	-0.150823		8.61	2.15292	0.03	-3.50656
28.46	3.3485	0.48	-0.733969		29.84	3.39585	35.12	3.55877
0.87	-0.139262	9.32	2.23216		0.4	-0.916291	3.33	1.20297
1.2	0.182322	0.03	-3.50656		1e-06	-13.8155	0.09	-2.40795
4.22	1.43984	0.2	-1.60944		13.16	2.57718	0.08	-2.52573
8.78	2.17248	16.51	2.80397		1.07	0.0676586	0.85	-0.162519
2.67	0.982078	0.11	-2.20727		18.27	2.90526	15	2.70805
17.64	2.87017	20.64	3.02723		1e-06	-13.8155	8.14	2.09679
0.15	-1.89712	0.01	-4.60517		0.71	-0.34249	38.53	3.65144
8.44	2.13298	32.65	3.48584		3.48	1.24703	0.19	-1.66073
7.01	1.94734	0.68	-0.385662		11.61	2.45187	1.17	0.157004
7.36	1.99606	17.11	2.83966		11.6	2.45101	0.32	-1.13943
1e-06	-13.8155	10.9	2.38876		0.36	-1.02165	1.33	0.285179
13.03	2.56725	0.09	-2.40795		1e-06	-13.8155	2.58	0.947789
0.01	-4.60517	1.03	0.0295588		1e-06	-13.8155	1.39	0.329304
21.17	3.05259	1e-06	-13.8155		0.02	-3.91202	30.79	3.42719
17.87	2.88312	0.07	-2.65926		3.26	1.18173	0.26	-1.34707
9.86	2.28849	14.41	2.66792		9.65	2.26696	0.08	-2.52573
0.05	-2.99573	1e-06	-13.8155		0.1	-2.30259	0.11	-2.20727
6.33	1.8453	16.77	2.81959		4.19	1.4327	25.03	3.22008
5.29	1.66582	1e-06	-13.8155		1e-06	-13.8155	0.12	-2.12026
45.05	3.80777	5.87	1.76985		6.33	1.8453	0.15	-1.89712
5.54	1.71199	1.98	0.683097		0.76	-0.274437	5.39	1.68455
8.52	2.14242	6.28	1.83737		0.18	-1.7148	0.75	-0.287682
6.02	1.79509	3.11	1.13462		0.14	-1.96611	10.58	2.35897
2.73	1.0043	5.5	1.70475		0.02	-3.91202	1.26	0.231112
1.35	0.300105	8.23	2.10779		0.91	-0.0943107	8.7	2.16332
3.11	1.13462	7.36	1.99606		11.54	2.44582	3.33	1.20297
0.12	-2.12026	4.3	1.45862		7.99	2.07819	10.71	2.37118
4.79	1.56653	7.81	2.0554		40.97	3.71284	0.13	-2.04022
6.47	1.86718	26.87	3.29101		5.08	1.62531	14.16	2.65042
22.38	3.10817	3.56	1.26976		5.35	1.6771	1e-06	-13.8155
0.01	-4.60517	0.23	-1.46968		9.7	2.27213	0.63	-0.462035
0.32	-1.13943	6.74	1.90806		0.23	-1.46968	2.26	0.815365
1.39	0.329304	0.09	-2.40795		1e-06	-13.8155	2.04	0.71295
16.18	2.78378	8.64	2.1564		0.25	-1.38629	13.13	2.5749
25.73	3.24766	1.1	0.0953102		6.37	1.8516	9.09	2.20717
14.38	2.66584	0.06	-2.81341		22.21	3.10054	0.03	-3.50656
9.84	2.28646	0.74	-0.301105		5.13	1.63511	12.28	2.50797
4.19	1.4327	0.02	-3.91202		9.33	2.23324	0.84	-0.174353
19.31	2.96062	1e-06	-13.8155		1.36	0.307485	17.16	2.84258
9.59	2.26072	1e-06	-13.8155		10.92	2.3906	10.79	2.37862
0.15	-1.89712	1.16	0.14842		0.2	-1.60944	0.06	-2.81341
1e-06	-13.8155	1e-06	-13.8155		0.02	-3.91202	3.07	1.12168
0.18	-1.7148	16.71	2.81601		7.62	2.03078	20.2	3.00568
1e-06	-13.8155	4.79	1.56653		0.29	-1.23787	1.95	0.667829
19.35	2.96269	16.24	2.78748		1.53	0.425268	1e-06	-13.8155
0.25	-1.38629	0.57	-0.562119		0.62	-0.478036	5.72	1.74397
0.46	-0.776529	0.16	-1.83258		0.42	-0.867501	7.91	2.06813
13.03	2.56725	3.21	1.16627		4.87	1.58309	2.99	1.09527
0.01	-4.60517	16.61	2.81		4.17	1.42792	1.12	0.113329
6.83	1.92132	2.64	0.970779		8.63	2.15524	0.17	-1.77196
8.85	2.18042	30.53	3.41871		4.09	1.40854	0.05	-2.99573
3.66	1.29746	8.22	2.10657		11.6	2.45101	1e-06	-13.8155
0.02	-3.91202	19.5	2.97041		11.7	2.45959	0.09	-2.40795
0.43	-0.84397	2.2	0.788457		11.53	2.44495	7.95	2.07317
5.82	1.7613	10.49	2.35042		7.94	2.07191	3.01	1.10194
0.12	-2.12026	8.63	2.15524		31.18	3.43978	0.71	-0.34249
13.42	2.59675	15.73	2.75557		1e-06	-13.8155	2.13	0.756122
15.59	2.74663	0.5	-0.693147		12.93	2.55955	3.43	1.23256
0.34	-1.07881	1.81	0.593327		37.19	3.61604	0.98	-0.0202027
7.36	1.99606	6.45	1.86408		11.17	2.41323	1e-06	-13.8155
0.08	-2.52573	2.68	0.985817		0.8	-0.223144	0.44	-0.820981
10.65	2.36556	19.09	2.94916		17.39	2.8559	7.75	2.04769
6.9	1.93152	0.51	-0.673345		1.56	0.444686	0.04	-3.21888
0.26	-1.34707	0.39	-0.941609		2.49	0.912283	11.55	2.44669
3.88	1.35584	9.2	2.2192		7.09	1.95869	13.1	2.57261
2.22	0.797507	8.79	2.17361		0.36	-1.02165	8.98	2.195
9.83	2.28544	2.47	0.904218		3.15	1.1474	12.25	2.50553
1e-06	-13.8155	13.06	2.56955		8.4	2.12823	12	2.48491
10.16	2.31846	10.24	2.3263		19.76	2.98366	8.29	2.11505
0.06	-2.81341	0.42	-0.867501		1e-06	-13.8155	10.77	2.37676
0.22	-1.51413	1e-06	-13.8155		5.66	1.73342	1.56	0.444686
9.55	2.25654	5.17	1.64287		0.29	-1.23787	21.06	3.04738
0.68	-0.385662	35.92	3.58129		1.1	0.0953102	2.87	1.05431
22.88	3.13026	2.71	0.996949		0.16	-1.83258	15.37	2.73242
10.7	2.37024	22.61	3.11839		1.24	0.215111	2.49	0.912283
0.16	-1.83258	0.03	-3.50656		15.42	2.73567	8.34	2.12106
7.98	2.07694	6.57	1.88251		30.13	3.40552	0.11	-2.20727
15.79	2.75938	8.62	2.15409		1.13	0.122218	8.04	2.08443
15.74	2.75621	0.58	-0.544727		22.52	3.1144	0.2	-1.60944
0.71	-0.34249	3.66	1.29746		19.84	2.9877	2.67	0.982078
0.2	-1.60944	8.21	2.10535		6.21	1.82616	0.25	-1.38629
0.25	-1.38629	14.51	2.67484		0.72	-0.328504	4.32	1.46326
4.46	1.49515	0.78	-0.248461		13.6	2.61007	0.09	-2.40795
14.64	2.68376	10.09	2.31154		11.36	2.4301	0.02	-3.91202
7.85	2.06051	0.28	-1.27297		9.28	2.22786	10.34	2.33602
10.47	2.34851	9.28	2.22786		12.76	2.54632	8.38	2.12585
0.25	-1.38629	0.1	-2.30259		25.63	3.24376	1e-06	-13.8155
0.26	-1.34707	0.54	-0.616186		0.13	-2.04022	3.95	1.37372
0.94	-0.0618754	5.07	1.62334		0.01	-4.60517	0.28	-1.27297
3.31	1.19695	12.97	2.56264		20.12	3.00171	5.63	1.72811
0.9	-0.105361	0.05	-2.99573		15.04	2.71071	10.14	2.31649
5.93	1.78002	0.28	-1.27297		17.24	2.84723	3.31	1.19695
5.64	1.72988	0.82	-0.198451		1.69	0.524729	2.29	0.828552
7.63	2.03209	11.99	2.48407		0.27	-1.30933	0.26	-1.34707
7.22	1.97685	0.38	-0.967584		0.27	-1.30933	5.64	1.72988
2.63	0.966984	5.85	1.76644		4.1	1.41099	11.49	2.44148
1.72	0.542324	2.27	0.81978		0.65	-0.430783	1e-06	-13.8155
0.75	-0.287682	2.57	0.943906		0.33	-1.10866	1e-06	-13.8155
1.83	0.604316	1.91	0.647103		25.27	3.22962	0.4	-0.916291
2.89	1.06126	11.43	2.43624		0.59	-0.527633	6.5	1.8718
0.97	-0.0304592	15.6	2.74727		0.68	-0.385662	12.07	2.49072
15.46	2.73826	1.13	0.122218		0.62	-0.478036	0.18	-1.7148
1.59	0.463734	6.39	1.85473		13.67	2.6152	2.05	0.71784
0.77	-0.261365	5.17	1.64287		0.01	-4.60517	5.95	1.78339
6.15	1.81645	2.61	0.95935		7.91	2.06813	14.89	2.70069
4.01	1.38879	3.97	1.37877		0.09	-2.40795	2.5	0.916291
0.91	-0.0943107	15.9	2.76632		15.2	2.7213	11.35	2.42922
13.92	2.63333	0.32	-1.13943		9.09	2.20717	15.52	2.74213
3.6	1.28093	1.08	0.076961		12.12	2.49486	6.04	1.7984
1.25	0.223144	0.36	-1.02165		0.76	-0.274437	1.42	0.350657
0.87	-0.139262	3.53	1.2613		10.1	2.31254	8.77	2.17134
0.47	-0.755023	13.61	2.6108		22.37	3.10772	16.83	2.82316
1e-06	-13.8155	11.89	2.4757		1.79	0.582216	0.23	-1.46968
12.89	2.55645	0.92	-0.0833816		1e-06	-13.8155	1e-06	-13.8155
1e-06	-13.8155	0.88	-0.127833		12.02	2.48657	1e-06	-13.8155
1e-06	-13.8155	1e-06	-13.8155		28.19	3.33897	8.08	2.08939
5.88	1.77156	2.27	0.81978		0.26	-1.34707	2.96	1.08519
1.01	0.00995033	7.8	2.05412		3.62	1.28647	2.24	0.806476
7.21	1.97547	8.45	2.13417		1.1	0.0953102	9.7	2.27213
13.61	2.6108	5.09	1.62728		29.52	3.38507	1.4	0.336472
0.07	-2.65926	14.96	2.70538		28.73	3.35794	1.13	0.122218
0.97	-0.0304592	4.03	1.39377		18.97	2.94286	4.08	1.4061
4.37	1.47476	0.01	-4.60517		1e-06	-13.8155	5.92	1.77834
2.03	0.708036	0.5	-0.693147		3.09	1.12817	1.22	0.198851
1e-06	-13.8155	0.03	-3.50656		26.26	3.26805	1e-06	-13.8155
17	2.83321	0.79	-0.235722		22.25	3.10234	5.87	1.76985
7.26	1.98238	15.44	2.73696		17.12	2.84025	0.51	-0.673345
0.11	-2.20727	15.35	2.73112		29.65	3.38946	10.65	2.36556
21.83	3.08329	6.97	1.94162		18.05	2.89315	7.41	2.00283
0.05	-2.99573	0.32	-1.13943		0.07	-2.65926	1e-06	-13.8155
9.93	2.29556	2.17	0.774727		19.88	2.98971	5.06	1.62137
4.27	1.45161	0.01	-4.60517		1e-06	-13.8155	2.2	0.788457
2.11	0.746688	2.45	0.896088		0.01	-4.60517	3.45	1.23837
0.39	-0.941609	6.08	1.805		22.71	3.12281	0.2	-1.60944
6.07	1.80336	6.47	1.86718		9.6	2.26176	10.61	2.3618
7.26	1.98238	11.48	2.44061		0.42	-0.867501	29.64	3.38912
0.12	-2.12026	0.01	-4.60517		6.22	1.82777	12.67	2.53924
6.27	1.83578	11.23	2.41859		1.98	0.683097	3.13	1.14103
0.03	-3.50656	0.11	-2.20727		1e-06	-13.8155	11.96	2.48157
0.16	-1.83258	1.58	0.457425		34.75	3.54818	9.27	2.22678
0.14	-1.96611	11.11	2.40785		3.11	1.13462	18.17	2.89977
10.04	2.30658	16.7	2.81541		0.08	-2.52573	0.05	-2.99573
18.85	2.93651	10.64	2.36462		4.68	1.5433	5.33	1.67335
11.75	2.46385	18.28	2.90581		0.01	-4.60517	0.32	-1.13943
0.82	-0.198451	8.02	2.08194		1e-06	-13.8155	24.1	3.18221
0.46	-0.776529	6.03	1.79675		1e-06	-13.8155	5.29	1.66582
1.1	0.0953102	2.97	1.08856		19.61	2.97604	0.03	-3.50656
6.99	1.94448	8.77	2.17134		2.52	0.924259	0.1	-2.30259
19.46	2.96836	0.11	-2.20727		8.74	2.16791	5.6	1.72277
20.96	3.04262	1.94	0.662688		0.03	-3.50656	6.37	1.8516
2.4	0.875469	1.87	0.625938		9.32	2.23216	5.33	1.67335
4.71	1.54969	1.2	0.182322		34.37	3.53718	6.55	1.87947
1e-06	-13.8155	1.55	0.438255		0.36	-1.02165	0.93	-0.0725707
17.36	2.85417	10.14	2.31649		28.06	3.33435	0.52	-0.653926
15.68	2.75239	0.11	-2.20727		17.15	2.842	5.77	1.75267
6.86	1.92571	10.85	2.38417		51.2	3.93574	0.1	-2.30259
4.18	1.43031	3.18	1.15688		3.48	1.24703	11.65	2.45531
0.55	-0.597837	2.2	0.788457		15.96	2.77009	10.39	2.34084
3.78	1.32972	0.05	-2.99573		0.52	-0.653926	0.11	-2.20727
6.66	1.89612	1.13	0.122218		2.31	0.837248	17.6	2.8679
11.87	2.47401	2.13	0.756122		14.96	2.70538	20.97	3.04309
0.07	-2.65926	1.08	0.076961		18.88	2.9381	0.37	-0.994252
5.74513	-0.273217	5.80625	-0.641768		7.34174	-0.00929201	6.58618	-0.270851
	0.07		1.08			18.88		0.37
		TTEST	0.852634				TTEST	0.0464127

## Sheet: 006
Fa0M		Fbb3M			H2a0M		H2o2a3MR				t-test	normal values	LN transformed
Tail DNA		Tail DNA			Tail DNA		Tail DNA			FB	0M-3M	0.0602962	0.473171
2.15	0.765468	4.96	1.60141		1.73	0.548121	39.61	3.67908		H2O2	0M-3M	0.136732	0.804891
3.83	1.34286	0.02	-3.91202		1e-06	-13.8155	20.86	3.03783				0.0985142	0.639031
14.12	2.64759	1e-06	-13.8155		13.04	2.56802	0.55	-0.597837
0.33	-1.10866	0.09	-2.40795		10.03	2.30558	4.27	1.45161
1e-06	-13.8155	1e-06	-13.8155		1e-06	-13.8155	27.71	3.32179
16.43	2.79911	0.03	-3.50656		0.01	-4.60517	19.96	2.99373
5.98	1.78842	11.15	2.41144		16.37	2.79545	7.97	2.07568
4.12	1.41585	2.52	0.924259		23.77	3.16842	15.33	2.72981
2.99	1.09527	4.32	1.46326		4.92	1.59331	17.09	2.83849
1.48	0.392042	0.35	-1.04982		3.71	1.31103	0.08	-2.52573
0.13	-2.04022	1.52	0.41871		19.15	2.9523	6.12	1.81156
12.39	2.51689	8.65	2.15756		11.25	2.42037	0.38	-0.967584
8.73	2.16677	1.58	0.457425		23.57	3.15997	1.01	0.00995033
1e-06	-13.8155	1e-06	-13.8155		7.18	1.9713	11.98	2.48324
3.15	1.1474	1e-06	-13.8155		5.2	1.64866	15.3	2.72785
2.2	0.788457	0.88	-0.127833		9.39	2.23965	24.02	3.17889
0.38	-0.967584	1.37	0.314811		2.42	0.883768	1e-06	-13.8155
0.47	-0.755023	0.02	-3.91202		9.85	2.28747	25.33	3.23199
0.44	-0.820981	23.53	3.15828		6.44	1.86253	17.96	2.88815
0.3	-1.20397	1.78	0.576613		8.92	2.1883	0.02	-3.91202
0.71	-0.34249	1.95	0.667829		8.67	2.15987	22.07	3.09422
1e-06	-13.8155	2.34	0.850151		0.37	-0.994252	9.85	2.28747
2.02	0.703098	25.93	3.2554		7.39	2.00013	13.29	2.58701
1.58	0.457425	39.96	3.68788		13.19	2.57946	6.96	1.94018
0.01	-4.60517	28.49	3.34955		10.58	2.35897	0.06	-2.81341
3.22	1.16938	42.27	3.74408		0.2	-1.60944	15.13	2.71668
15.64	2.74983	0.01	-4.60517		22.34	3.10638	1e-06	-13.8155
1e-06	-13.8155	12.25	2.50553		4.81	1.5707	15.86	2.7638
1.92	0.652325	0.02	-3.91202		1.2	0.182322	26.21	3.26614
0.01	-4.60517	5.03	1.61542		6.27	1.83578	0.11	-2.20727
8.7	2.16332	28.55	3.35166		0.93	-0.0725707	6.2	1.82455
10.02	2.30458	21.02	3.04547		6.36	1.85003	1.84	0.609766
10.33	2.33505	0.32	-1.13943		8.24	2.109	2.98	1.09192
5.33	1.67335	4.39	1.47933		18.56	2.92101	7.64	2.0334
8.09	2.09063	11.51	2.44322		0.07	-2.65926	0.42	-0.867501
10.52	2.35328	11.18	2.41413		7.79	2.05284	1.32	0.277632
9.4	2.24071	1e-06	-13.8155		14.54	2.6769	1e-06	-13.8155
5.11	1.6312	1.83	0.604316		30.33	3.41214	4.43	1.4884
9.08	2.20607	2.82	1.03674		4.66	1.53902	5.53	1.71019
3.87	1.35325	7.09	1.95869		1.45	0.371564	1e-06	-13.8155
4.02	1.39128	0.59	-0.527633		0.69	-0.371064	19.51	2.97093
10.79	2.37862	27.67	3.32035		1e-06	-13.8155	7.88	2.06433
0.01	-4.60517	26.52	3.2779		1	0	33.28	3.50496
1.77	0.57098	1e-06	-13.8155		0.11	-2.20727	3.66	1.29746
3.8	1.335	12.96	2.56187		0.28	-1.27297	0.87	-0.139262
11.35	2.42922	3.07	1.12168		0.85	-0.162519	27.69	3.32107
0.32	-1.13943	0.01	-4.60517		11.29	2.42392	1e-06	-13.8155
7.43	2.00553	22.82	3.12764		0.82	-0.198451	7.03	1.95019
9.25	2.22462	0.01	-4.60517		20.21	3.00618	31.04	3.43528
0.02	-3.91202	0.22	-1.51413		0.09	-2.40795	8.74	2.16791
3.185	1.15839	2.145	0.75899		6.315	1.8429	7.335	1.99179
4.6788	-0.481661	8.072	-1.11631		7.6048	0.32106	10.703	0.0750995
	0.617757		0.327486			1.37859		1.07799

## Sheet: 008
0M_Fa		3MR-Fb			0M_Ha_154		3M_HbR				t-test	normal values	LN transformed
Tail DNA		Tail DNA			Tail DNA		Tail DNA			FB	0M-3M	0.208303	0.756707
0.72	-0.328504	0.38	-0.967584		1.36	0.307485	0.32	-1.13943		H2O2	0M-3M	0.942397	0.369055
0.51	-0.673345	12.1	2.49321		18.16	2.89922	12.85	2.55334				0.57535	0.562881
1e-05	-11.5129	1.56	0.444686		8.06	2.08691	6.61	1.88858
12.43	2.52011	0.11	-2.20727		12.07	2.49072	2.42	0.883768
1.16	0.14842	3.59	1.27815		0.28	-1.27297	1.25	0.223144
7.34	1.99334	11.61	2.45187		1.18	0.165514	7.85	2.06051
0.28	-1.27297	7.63	2.03209		0.06	-2.81341	8.58	2.14943
12.75	2.54553	6.19	1.82294		0.42	-0.867501	0.31	-1.17118
19.04	2.94654	0.35	-1.04982		5.27	1.66203	0.48	-0.733969
0.17	-1.77196	1e-06	-13.8155		0.42	-0.867501	9.49	2.25024
0.2	-1.60944	10.98	2.39608		14.93	2.70337	1e-05	-11.5129
7.75	2.04769	7.05	1.95303		1e-06	-13.8155	24.19	3.18594
0.05	-2.99573	16.97	2.83145		9.57	2.25863	20.94	3.04166
0.73	-0.314711	11.17	2.41323		9.7	2.27213	1.12	0.113329
3.29	1.19089	11.07	2.40424		1.72	0.542324	0.04	-3.21888
2.92	1.07158	0.28	-1.27297		0.51	-0.673345	30.67	3.42328
5.46	1.69745	13.63	2.61227		28.96	3.36592	4.78	1.56444
1.02	0.0198026	1.74	0.553885		0.06	-2.81341	30.64	3.42231
5.66	1.73342	0.09	-2.40795		21.8	3.08191	6.49	1.87026
1.56	0.444686	4.62	1.53039		9.78	2.28034	3.46	1.24127
15.54	2.74342	0.32	-1.13943		22.03	3.09241	25.62	3.24337
0.03	-3.50656	0.47	-0.755023		5.28	1.66393	7.32	1.99061
6.54	1.87794	0.22	-1.51413		4.09	1.40854	0.04	-3.21888
13.74	2.62031	0.16	-1.83258		4.25	1.44692	0.66	-0.415515
5.52	1.70838	10.58	2.35897		1.13	0.122218	19.59	2.97502
5.5	1.70475	1.4	0.336472		0.62	-0.478036	0.97	-0.0304592
6.02	1.79509	2.64	0.970779		21.5	3.06805	7.08	1.95727
0.71	-0.34249	1e-06	-13.8155		6.59	1.88555	26.62	3.28166
2.39	0.871293	24.55	3.20071		2.72	1.00063	0.79	-0.235722
12.34	2.51285	21.24	3.05589		5.03	1.61542	1e-05	-11.5129
4.27	1.45161	36.41	3.59484		3.25	1.17865	0.38	-0.967584
2.63	0.966984	1.97	0.678034		8.81	2.17589	10.99	2.39699			t-test	normal values	LN transformed
1.23	0.207014	0.78	-0.248461		0.02	-3.91202	1.2	0.182322		FB	0M-3M	0.47487	0.990934
0.19	-1.66073	9.73	2.27521		13.39	2.59451	0.41	-0.891598		H2O2	0M-3M	0.560749	0.123959
4.6	1.52606	26.73	3.28579		15.34	2.73046	21.35	3.06105				0.517809	0.557447
2.71	0.996949	1e-06	-13.8155		16.85	2.82435	0.84	-0.174353
0.43	-0.84397	1.15	0.139762		4.49	1.50185	0.35	-1.04982
4.3	1.45862	1	0		5.93	1.78002	1.3	0.262364
4.93	1.59534	4.15	1.42311		1.45	0.371564	1e-05	-11.5129
12.93	2.55955	12.54	2.52892		9.25	2.22462	0.26	-1.34707
0.42	-0.867501	1.16	0.14842		21.86	3.08466	0.01	-4.60517
3.27	1.18479	5.34	1.67523		10.35	2.33699	7.53	2.0189
14.48	2.67277	20.43	3.017		12.89	2.55645	19.64	2.97757
16.39	2.79667	1.23	0.207014		0.92	-0.0833816	0.23	-1.46968
1e-05	-11.5129	32.56	3.48308		0.4	-0.916291	12.04	2.48823
6.77	1.9125	0.19	-1.66073		0.15	-1.89712	20.7	3.03013
0.01	-4.60517	1.57	0.451076		7.05	1.95303	25.54	3.24025
8.24	2.109	0.06	-2.81341		42.74	3.75514	0.65	-0.430783
11.3	2.4248	4.85	1.57898		4.68	1.5433	6.12	1.81156
0.73	-0.314711	1.87	0.625938		0.45	-0.798508	14.09	2.64547
3.28	1.18784	2.305	0.824406		5.15	1.63873	4.12	1.40285
5.024	0.27845	6.9284	0.0587368		7.9564	0.856453	8.0962	0.235908
	1.32108		1.0605			2.35479		1.26606
ttest			0.756707					0.369055

## Sheet: 009
0M_FbB		3M_FB			0M_H2O2		3M_H2O2				t-test	normal values	LN transformed
Tail DNA		Tail DNA			Tail DNA		Tail DNA			FB	0M-3M	0.383033	0.753983
0.37	-0.994252	10.79	2.37862		0.05	-2.99573	8.08	2.08939		H2O2	0M-3M	0.134719	0.809639
0.01	-4.60517	14.13	2.6483		43.11	3.76375	4.59	1.52388				0.258876	0.781811
2.97	1.08856	13.06	2.56955		40.7	3.70623	3.99	1.38379
2.49	0.912283	0.45	-0.798508		1.19	0.173953	0.16	-1.83258
0.64	-0.446287	1.04	0.0392207		4.53	1.51072	0.52	-0.653926
8.43	2.1318	1.33	0.285179		1e-06	-13.8155	6.41	1.85786
2.89	1.06126	9.68	2.27006		1e-06	-13.8155	1e-06	-13.8155
5.33	1.67335	29.96	3.39986		0.08	-2.52573	0.06	-2.81341
11.57	2.44842	0.05	-2.99573		23.02	3.13636	11.63	2.45359
0.25	-1.38629	2.85	1.04732		9.8	2.28238	3.75	1.32176
8.62	2.15409	1e-06	-13.8155		1.42	0.350657	8.06	2.08691
0.2	-1.60944	14.71	2.68853		5.02	1.61343	1.79	0.582216
3.62	1.28647	3.87	1.35325		1.41	0.34359	13.32	2.58927
25.36	3.23317	9.5	2.25129		20.35	3.01308	19.97	2.99423
35.37	3.56586	15.07	2.71271		0.44	-0.820981	0.55	-0.597837
0.01	-4.60517	0.39	-0.941609		2.78	1.02245	0.69	-0.371064
2.65	0.97456	2.32	0.841567		4.69	1.54543	9.97	2.29958
5.08	1.62531	3.74	1.31909		7.84	2.05924	14.06	2.64333
1.2	0.182322	0.01	-4.60517		16.84	2.82376	1e-06	-13.8155
1.26	0.231112	5.9	1.77495		2.06	0.722706	1e-06	-13.8155
14.37	2.66514	1.26	0.231112		9.72	2.27419	1.75	0.559616
16.6	2.8094	6.63	1.8916		0.05	-2.99573	23.08	3.13897
1e-06	-13.8155	0.33	-1.10866		4.42	1.48614	33.38	3.50796
0.54	-0.616186	4.67	1.54116		0.86	-0.150823	0.02	-3.91202
7.28	1.98513	0.14	-1.96611		14.92	2.7027	1.19	0.173953
0.16	-1.83258	3.89	1.35841		12.31	2.51041	7.62	2.03078
0.49	-0.71335	1.84	0.609766		0.05	-2.99573	13.69	2.61667
8.21	2.10535	13.55	2.60639		0.11	-2.20727	2.69	0.989541
1.55	0.438255	2.66	0.978326		22.71	3.12281	0.56	-0.579818
1e-06	-13.8155	1e-06	-13.8155		9.42	2.24284	0.19	-1.66073
0.07	-2.65926	0.41	-0.891598		0.44	-0.820981	0.01	-4.60517
4.15	1.42311	15.43	2.73631		16.98	2.83204	10	2.30259
6.21	1.82616	0.52	-0.653926		9.02	2.19944	0.1	-2.30259
23.72	3.16632	1	0		29.61	3.38811	15.25	2.72458
10.67	2.36744	6.35	1.84845		13.96	2.6362	0.01	-4.60517
0.07	-2.65926	1.85	0.615186		16.1	2.77882	13.97	2.63691
0.02	-3.91202	2.02	0.703098		0.02	-3.91202	1.14	0.131028
27.95	3.33042	0.01	-4.60517		0.02	-3.91202	9.91	2.29354
10.3	2.33214	0.09	-2.40795		0.32	-1.13943	0.41	-0.891598
8.63	2.15524	1e-06	-13.8155		1e-06	-13.8155	0.42	-0.867501
6.54	1.87794	13.89	2.63117		17.07	2.83732	13.57	2.60786
0.57	-0.562119	6.8	1.91692		11.44	2.43712	13.56	2.60712
0.16	-1.83258	1.95	0.667829		17.12	2.84025	7.57	2.02419
0.25	-1.38629	0.16	-1.83258		31.97	3.4648	16.63	2.81121
14	2.63906	5.93	1.78002		1.5	0.405465	15.86	2.7638
13.49	2.60195	3.51	1.25562		22.68	3.12148	12.9	2.55723
0.43	-0.84397	0.69	-0.371064		0.17	-1.77196	18.62	2.92424
17.65	2.87074	3.91	1.36354		27.45	3.31237	14.62	2.68239
16.45	2.80033	19.75	2.98315		16.23	2.78686	1.39	0.329304
0.68	-0.385662	10.15	2.31747		10.43	2.34469	9.67	2.26903
2.93	1.07491	2.755	1.01282		6.43	1.83633	5.5	1.69087
6.5906	0.0656352	5.3648	-0.140191		10.0486	0.241937	7.3476	0.0673672
	1.06784		0.869192			1.27371		1.06969

## Sheet: 010
0M_FB		3M_FB			0M_H2O2		3M_H2O2				t-test	normal values	LN transformed
Tail DNA		Tail DNA			Tail DNA		Tail DNA			FB	0M-3M	0.770848	0.783278
1e-06	-13.8155	0.15	-1.89712		1.81	0.593327	13.49	2.60195		H2O2	0M-3M	0.214763	0.418781
0.32	-1.13943	7.43	2.00553		17.39	2.8559	2.09	0.737164				0.492805	0.60103
0.32	-1.13943	1e-06	-13.8155		21.15	3.05164	0.02	-3.91202
3.47	1.24415	0.05	-2.99573		1e-06	-13.8155	8.21	2.10535
8.77	2.17134	0.12	-2.12026		10.83	2.38232	14.77	2.6926
0.04	-3.21888	13.51	2.60343		4.14	1.4207	0.33	-1.10866
8.87	2.18267	11.49	2.44148		1.3	0.262364	0.15	-1.89712
3.62	1.28647	21.33	3.06011		0.3	-1.20397	3.5	1.25276
21.22	3.05494	0.3	-1.20397		9.45	2.24601	1.2	0.182322
1.04	0.0392207	7.23	1.97824		3.41	1.22671	1e-06	-13.8155
5.39	1.68455	15.45	2.73761		5.66	1.73342	0.23	-1.46968
0.12	-2.12026	0.15	-1.89712		31.16	3.43914	10.41	2.34277
0.25	-1.38629	2.07	0.727549		1e-06	-13.8155	1e-06	-13.8155
0.17	-1.77196	0.29	-1.23787		5.11	1.6312	0.35	-1.04982
6.19	1.82294	0.15	-1.89712		26.36	3.27185	0.12	-2.12026
4.44	1.49065	3.4	1.22378		1.56	0.444686	0.02	-3.91202
6.19	1.82294	14.47	2.67208		7.95	2.07317	15.2	2.7213
17.25	2.84781	10.83	2.38232		27.19	3.30285	4.1	1.41099
0.06	-2.81341	1e-06	-13.8155		0.15	-1.89712	10.36	2.33795
5.13	1.63511	15.4	2.73437		14.21	2.65395	19.88	2.98971
1e-06	-13.8155	1.26	0.231112		0.25	-1.38629	21.51	3.06852
2.45	0.896088	13.18	2.5787		1e-06	-13.8155	0.08	-2.52573
0.29	-1.23787	11.61	2.45187		14.32	2.66166	1.07	0.0676586
5.36	1.67896	3.4	1.22378		11.42	2.43537	12.4	2.5177
0.54	-0.616186	3.37	1.21491		14.64	2.68376	15.1	2.71469
0.17	-1.77196	0.19	-1.66073		0.08	-2.52573	0.09	-2.40795
10.2	2.32239	4.59	1.52388		0.23	-1.46968	0.22	-1.51413
14.07	2.64404	11.06	2.40333		9.52	2.25339	1e-06	-13.8155
2.44	0.891998	0.26	-1.34707		0.69	-0.371064	2.09	0.737164
0.12	-2.12026	11.03	2.40062		6.9	1.93152	2.57	0.943906
15.66	2.75111	9.78	2.28034		0.05	-2.99573	27.07	3.29843
19.18	2.95387	4.83	1.57485		11.29	2.42392	0.48	-0.733969
24.76	3.20923	0.33	-1.10866		0.94	-0.0618754	4.15	1.42311
0.35	-1.04982	0.29	-1.23787		12.9	2.55723	16.38	2.79606
0.1	-2.30259	5.6	1.72277		1e-06	-13.8155	14.2	2.65324
0.51	-0.673345	12.39	2.51689		5.51	1.70656	3.41	1.22671
4.51	1.5063	5.72	1.74397		0.01	-4.60517	11.82	2.46979
7.25	1.981	12.49	2.52493		2.96	1.08519	1e-06	-13.8155
5.5	1.70475	8.68	2.16102		20.6	3.02529	1e-06	-13.8155
3.04	1.11186	1.14	0.131028		1.68	0.518794	5.27	1.66203
31.35	3.44521	0.76	-0.274437		26.98	3.2951	11.29	2.42392
13.63	2.61227	6.98	1.94305		8.5	2.14007	0.03	-3.50656
10.13	2.3155	1.97	0.678034		0.14	-1.96611	0.19	-1.66073
16.56	2.80699	0.95	-0.0512933		20.53	3.02189	0.47	-0.755023
0.65	-0.430783	26.59	3.28054		2.44	0.891998	0.74	-0.301105
14.23	2.65535	1e-06	-13.8155		10.45	2.3466	24.63	3.20397
0.11	-2.20727	10.33	2.33505		0.88	-0.127833	0.6	-0.510826
1.83	0.604316	5.09	1.62728		0.12	-2.12026	8.74	2.16791
4.57	1.51951	0.5	-0.693147		21.67	3.07593	5.88	1.77156
18.02	2.89148	0.21	-1.56065		13.11	2.57338	11.88	2.47486
4.03	1.38856	3.995	1.37383		5.31	1.66888	2.33	0.840535
6.4088	0.203085	5.968	0.00969643		8.1588	-0.0555205	6.1358	-0.789342
	1.22518		1.00974			0.945993		0.454144

## Sheet: 011
0M_FB.		3M_FB			0m_H2o2A		3MR_Ha				t-test	normal values	LN transformed
Tail DNA		Tail DNA			Tail DNA	LN TD	Tail DNA			FB	0M-3M	0.913499	0.619472
5.82	1.7613	20.3	3.01062		4.92	1.59331	0.02	-3.91202		H2O2	0M-3M	0.169434	0.825081
1e-06	-13.8155	13.29	2.58701		5.19	1.64673	1.47	0.385262				0.541467	0.722276
8.08	2.08939	7.2	1.97408		2.16	0.770108	30.37	3.41346
32.39	3.47785	15.09	2.71403		3.31	1.19695	24.81	3.21125
1.95	0.667829	1e-06	-13.8155		12.05	2.48906	19.37	2.96373
27.7	3.32143	0.15	-1.89712		0.51	-0.673345	8.54	2.14476
9.29	2.22894	2.85	1.04732		32.36	3.47692	33.49	3.51125
1e-06	-13.8155	1e-06	-13.8155		2.41	0.879627	0.68	-0.385662
15.37	2.73242	0.04	-3.21888		0.79	-0.235722	30.44	3.41576
2.3	0.832909	12.61	2.53449		4.1	1.41099	1e-06	-13.8155
0.02	-3.91202	9.92	2.29455		0.05	-2.99573	3.28	1.18784
0.59	-0.527633	10.16	2.31846		6.82	1.91986	5.73	1.74572
7.37	1.99742	25.8	3.25037		0.67	-0.400478	1.85	0.615186
30.22	3.4085	1e-06	-13.8155		0.17	-1.77196	6.92	1.93442
0.71	-0.34249	15.76	2.75748		1.13	0.122218	24.92	3.21567
24.31	3.19089	1.51	0.41211		0.39	-0.941609	6.2	1.82455
11.44	2.43712	27.15	3.30138		1.21	0.19062	2.22	0.797507
11.13	2.40964	7.26	1.98238		15.54	2.74342	0.05	-2.99573
1e-06	-13.8155	5.08	1.62531		8.49	2.13889	0.15	-1.89712
17.41	2.85704	24.35	3.19253		10.65	2.36556	13.53	2.60491
3.24	1.17557	28.24	3.34074		20.88	3.03879	0.25	-1.38629
0.11	-2.20727	3.35	1.20896		1e-06	-13.8155	15.13	2.71668
1e-06	-13.8155	5.09	1.62728		1e-06	-13.8155	0.39	-0.941609
5.48	1.70111	1e-06	-13.8155		5.58	1.71919	14.99	2.70738
5.21	1.65058	13.75	2.62104		4.56	1.51732	22.3	3.10459
10.52	2.35328	1.29	0.254642		11.45	2.43799	10.86	2.38509
12.77	2.5471	33.46	3.51035		8.71	2.16447	1e-06	-13.8155
0.36	-1.02165	10.11	2.31353		5.95	1.78339	8.53	2.14359
0.39	-0.941609	0.01	-4.60517		21.17	3.05259	1e-06	-13.8155
11.31	2.42569	6.54	1.87794		15.47	2.7389	2.29	0.828552
1e-06	-13.8155	17.86	2.88256		0.21	-1.56065	10.96	2.39425
0.03	-3.50656	4.49	1.50185		0.01	-4.60517	1.28	0.24686
17.78	2.87807	4.05	1.39872		14.7	2.68785	0.01	-4.60517
35.11	3.55849	1.59	0.463734		0.65	-0.430783	4.05	1.39872
0.27	-1.30933	1.51	0.41211		5.12	1.63315	5.73	1.74572
1.25	0.223144	5.57	1.7174		1e-06	-13.8155	0.38	-0.967584
0.26	-1.34707	0.98	-0.0202027		0.13	-2.04022	4.99	1.60744
9.25	2.22462	3.14	1.14422		0.04	-3.21888	33.02	3.49711
4.87	1.58309	11.89	2.4757		6.55	1.87947	1e-06	-13.8155
1e-06	-13.8155	0.32	-1.13943		2.7	0.993252	9.08	2.20607
0.19	-1.66073	14.29	2.65956		0.74	-0.301105	0.65	-0.430783
1e-06	-13.8155	1e-06	-13.8155		0.11	-2.20727	15.17	2.71932
32.9	3.49347	1e-06	-13.8155		1e-06	-13.8155	0.01	-4.60517
9.45	2.24601	0.83	-0.18633		21.47	3.06666	29.87	3.39685
10.48	2.34947	0.63	-0.462035		0.86	-0.150823	0.95	-0.0512933
0.06	-2.81341	7.52	2.01757		15.74	2.75621	16.93	2.82909
6.57	1.88251	16.93	2.82909		23.6	3.16125	2.48	0.908259
9.6	2.26176	2.25	0.81093		3.58	1.27536	6.93	1.93586
0.08	-2.52573	0.82	-0.198451		10.85	2.38417	0.55	-0.597837
12.7	2.5416	0.66	-0.415515		0.72	-0.328504	1.96	0.672944
5.345	1.67584	4.785	1.56358		3.445	1.23616	4.52	1.50308
8.1268	-0.966317	7.9138	-0.459323		6.2894	-0.317801	8.6756	-0.112454
	0.380482		0.631711			0.727748		0.893638

## Sheet: 013
0M_FbB		3MR_Fa			0M_H2O2		3MR-Ha				t-test	normal values	LN transformed
Tail DNA		Tail DNA			Tail DNA		Tail DNA			FB	0M-3M	0.7426	0.605552
7.99	2.07819	29.1	3.37074		1e-06	-13.8155	7.32	1.99061		H2O2	0M-3M	0.647951	0.860393
11.22	2.4177	4.58	1.5217		0.11	-2.20727	16.67	2.81361				0.695275	0.732973
0.49	-0.71335	8.66	2.15871		8.2	2.10413	0.82	-0.198451
0.46	-0.776529	0.78	-0.248461		12.91	2.558	5.92	1.77834
30.38	3.41378	5	1.60944		15.65	2.75047	22.27	3.10324
8.48	2.13771	11.42	2.43537		0.12	-2.12026	6.42	1.85942
1e-06	-13.8155	0.13	-2.04022		0.07	-2.65926	16.17	2.78316
0.16	-1.83258	13.27	2.58551		16.21	2.78563	2.12	0.751416
2.68	0.985817	0.33	-1.10866		5.69	1.73871	0.16	-1.83258
28.56	3.35201	11.34	2.42834		13.41	2.596	7.3	1.98787
0.2	-1.60944	9.14	2.21266		0.01	-4.60517	2.62	0.963174
1.32	0.277632	11.47	2.43973		1e-06	-13.8155	8.47	2.13653
22.78	3.12588	9.51	2.25234		1e-06	-13.8155	9.77	2.27932
1.87	0.625938	0.01	-4.60517		31.21	3.44074	29.52	3.38507
0.58	-0.544727	6	1.79176		1.2	0.182322	8.11	2.0931
0.4	-0.916291	7.3	1.98787		5.39	1.68455	0.35	-1.04982
16.08	2.77758	0.55	-0.597837		12.93	2.55955	6.56	1.88099
0.29	-1.23787	0.04	-3.21888		1.06	0.0582689	4.47	1.49739
1e-06	-13.8155	16.41	2.79789		7.33	1.99198	2.99	1.09527
11.3	2.4248	8.36	2.12346		7.83	2.05796	2.45	0.896088
0.06	-2.81341	2.7	0.993252		2.74	1.00796	1e-06	-13.8155
15.29	2.7272	4.5	1.50408		14.63	2.68307	21.6	3.07269
5.7	1.74047	0.41	-0.891598		2.25	0.81093	8.23	2.10779
6.39	1.85473	0.3	-1.20397		0.44	-0.820981	1e-06	-13.8155
0.46	-0.776529	1e-06	-13.8155		10.81	2.38047	16.83	2.82316
11.6	2.45101	13.36	2.59227		29.15	3.37245	7.37	1.99742
0.17	-1.77196	0.1	-2.30259		4.03	1.39377	3.14	1.14422
0.8	-0.223144	0.41	-0.891598		15.58	2.74599	2	0.693147
31.7	3.45632	0.88	-0.127833		2.43	0.887891	1.31	0.270027
1e-06	-13.8155	4.49	1.50185		1e-06	-13.8155	6.86	1.92571
13.04	2.56802	1e-06	-13.8155		19.76	2.98366	6.75	1.90954
5.62	1.72633	15.34	2.73046		25.4	3.23475	0.3	-1.20397
6.08	1.805	14.2	2.65324		6.1	1.80829	1e-06	-13.8155
17.8	2.8792	1.13	0.122218		8.91	2.18717	7.38	1.99877
0.2	-1.60944	1.9	0.641854		3.45	1.23837	15.08	2.71337
0.01	-4.60517	2.13	0.756122		3.12	1.13783	1.21	0.19062
1e-06	-13.8155	0.06	-2.81341		3.48	1.24703	1e-06	-13.8155
0.18	-1.7148	1e-06	-13.8155		0.89	-0.116534	4.9	1.58924
6.59	1.88555	14.34	2.66305		26.52	3.2779	1e-06	-13.8155
0.8	-0.223144	18.17	2.89977		30.93	3.43173	0.48	-0.733969
5.12	1.63315	1.86	0.620576		0.05	-2.99573	27.97	3.33113
0.34	-1.07881	0.15	-1.89712		0.94	-0.0618754	8.07	2.08815
0.11	-2.20727	1.3	0.262364		1e-06	-13.8155	1e-06	-13.8155
0.4	-0.916291	11.55	2.44669		2.45	0.896088	0.37	-0.994252
2.01	0.698135	2.85	1.04732		0.17	-1.77196	0.48	-0.733969
1.37	0.314811	0.59	-0.527633		0.03	-3.50656	0.39	-0.941609
0.94	-0.0618754	0.45	-0.798508		16.39	2.79667	9.36	2.23645
18.76	2.93173	4.82	1.57277		0.27	-1.30933	2.93	1.075
8.21	2.10535	6.62	1.8901		0.22	-1.51413	1e-06	-13.8155
4.75	1.55814	7.87	2.06306		0.34	-1.07881	20.92	3.04071
1.62	0.470375	3.67	1.27459		3.285	1.1881	4.685	1.54331
6.1948	-0.49885	5.7176	-0.0808691		7.4162	-0.556302	6.6882	-0.737909
	0.607229		0.922314			0.573325		0.478112

## Sheet: 014
Fa_00B		Fb_3MR			Ha_0M		Ha_03				t-test	normal values	LN transformed
Tail DNA		Tail DNA			Tail DNA		Tail DNA			FB	0M-3M	0.639218	0.421811
0.12	-2.12026	12.58	2.53211		7.84	2.05924	0.23	-1.46968		H2O2	0M-3M	0.682152	0.537744
6.4	1.8563	1e-06	-13.8155		2	0.693147	0.49	-0.71335				0.660685	0.479778
10.1	2.31254	1.13	0.122218		4.71	1.54969	12.94	2.56032
5.07	1.62334	0.38	-0.967584		15.26	2.72524	1e-06	-13.8155
8.69	2.16217	0.01	-4.60517		2.53	0.928219	0.02	-3.91202
9.49	2.25024	4.84	1.57691		2.93	1.075	23.95	3.17597
5.61	1.72455	0.38	-0.967584		0.55	-0.597837	3.35	1.20896
1e-06	-13.8155	7.62	2.03078		0.32	-1.13943	0.87	-0.139262
6.04	1.7984	0.2	-1.60944		12.78	2.54788	3.84	1.34547
11	2.3979	1.11	0.10436		6.92	1.93442	0.63	-0.462035
3.15	1.1474	0.11	-2.20727		9.63	2.26488	1e-06	-13.8155
0.43	-0.84397	0.32	-1.13943		1.7	0.530628	0.34	-1.07881
9.8	2.28238	27.65	3.31963		1e-06	-13.8155	0.68	-0.385662
4.56	1.51732	0.14	-1.96611		13.87	2.62973	0.01	-4.60517
15	2.70805	0.02	-3.91202		6.19	1.82294	10.7	2.37024
6.5	1.8718	2.03	0.708036		0.11	-2.20727	11.66	2.45616
17.61	2.86847	1e-06	-13.8155		15.52	2.74213	2.75	1.0116
0.79	-0.235722	11.67	2.45702		0.05	-2.99573	35.55	3.57094
16.28	2.78994	13.15	2.57642		0.65	-0.430783	0.08	-2.52573
7.45	2.00821	9.93	2.29556		1.52	0.41871	6.18	1.82132
0.07	-2.65926	4.7	1.54756		13.43	2.59749	1e-06	-13.8155
4.8	1.56862	1.19	0.173953		0.3	-1.20397	0.02	-3.91202
0.28	-1.27297	0.33	-1.10866		1e-06	-13.8155	13.72	2.61885
0.51	-0.673345	16.15	2.78192		1e-06	-13.8155	31.81	3.45978
0.15	-1.89712	18.89	2.93863		18.5	2.91777	6.4	1.8563
28.5	3.3499	8.15	2.09802		0.33	-1.10866	0.02	-3.91202
22.81	3.1272	8.83	2.17816		8.97	2.19389	5.21	1.65058
1e-06	-13.8155	0.81	-0.210721		0.03	-3.50656	1e-06	-13.8155
0.73	-0.314711	1e-06	-13.8155		0.84	-0.174353	0.15	-1.89712
0.15	-1.89712	1e-06	-13.8155		4.33	1.46557	0.04	-3.21888
0.12	-2.12026	3.2	1.16315		13.82	2.62612	22.66	3.1206
0.01	-4.60517	16.52	2.80457		1.8	0.587787	11.93	2.47906
4.24	1.44456	0.67	-0.400478		1.69	0.524729	21.67	3.07593
1e-06	-13.8155	0.54	-0.616186		3.36	1.21194	11.98	2.48324
10.78	2.37769	10.13	2.3155		0.73	-0.314711	8.22	2.10657
11.18	2.41413	0.5	-0.693147		15.11	2.71536	10.09	2.31154
1.22	0.198851	1e-06	-13.8155		0.27	-1.30933	1.33	0.285179
0.55	-0.597837	0.16	-1.83258		13.44	2.59824	5.01	1.61144
4.21	1.43746	23.97	3.1768		0.43	-0.84397	10.52	2.35328
1e-06	-13.8155	0.75	-0.287682		10.84	2.38324	5.29	1.66582
0.33	-1.10866	5.35	1.6771		1e-06	-13.8155	0.85	-0.162519
1e-06	-13.8155	1e-06	-13.8155		16.13	2.78068	14.46	2.67139
1.91	0.647103	0.85	-0.162519		14.34	2.66305	0.6	-0.510826
1.17	0.157004	0.13	-2.04022		0.13	-2.04022	0.01	-4.60517
0.55	-0.597837	7.8	2.05412		25.83	3.25154	2.67	0.982078
3.78	1.32972	1.77	0.57098		16.75	2.8184	3.32	1.19996
0.02	-3.91202	2.62	0.963174		3.53	1.2613	0.05	-2.99573
10.06	2.30857	1e-06	-13.8155		0.28	-1.27297	0.69	-0.371064
6.51	1.87334	1.98	0.683097		0.43	-0.84397	22.44	3.11085
0.27	-1.30933	0.03	-3.50656		0.63	-0.462035	1e-06	-13.8155
3.465	1.23856	0.98	-0.0290795		2.265	0.810683	2.71	0.99684
5.18	-0.7938	4.5858	-1.60184		5.827	-0.343898	6.5086	-0.947824
	0.452124		0.201525			0.709001		0.387584

[truncated: 21 more sheets: 015, 016, 017, 018, 019, 020, 021, 022, 023, 024, 025, 026, 027, 028, MedD-Units, MDsvsCHANGE, mMDietAdScore, MedAdh-Adj, FoodWx0M, FoodWx3M …]
